# Supplementary material for: Inducible progenitor-derived Wingless regulates adult midgut regeneration in Drosophila
Source: PubMed Central journal article supplement — EMBO J. 2012 Sep 4;31(19):3901–17. doi: 10.1038/emboj.2012.248 (PMC3463851; doi:10.1038/emboj.2012.248), 2012-09-04
Supplement: emboj2012248s1.pdf [file emboj2012248s1.pdf]

## Supplementary Information

### Materials and Methods

#### Fly stocks

The following fly stocks were kindly provided to us by our colleagues: *esg<sup>ts</sup>>gfp* (Shigeo Hayashi), *Su(H)GBE-gal4* (Steven X Hou), *MyoIA<sup>ts</sup>>gfp*, *UAS-Upd*, *esg<sup>ts</sup>F/O* (Bruce Edgar) the double loss of function alleles *fz<sup>H51</sup>*, *fz2<sup>C1</sup>* (Jun Wu and Marek Mlodzik), *UAS-hep<sup>wt</sup>*, *UAS-hep<sup>act</sup>* (Aaron Diantonio), *dm<sup>4</sup>* (Peter Gallant), *pygo<sup>S123</sup>* (Mariann Bienz), *MARCM FRT2A* (Jean Paul Vincent), MARCM 82B (David Bilder). The rest of the lines used were obtained from VDRC and the Bloomington Stock collection.

**RNAi lines:** All lines used in this study belong to VDRC and have the corresponding ID numbers: *UAS-wg-IR* (13351) (Insertions in chromosomes II and III), *UAS-wg-IR* KK (104579), *UAS-wls-IR* KK (103812), *UAS-stat-IR* (43866), *UAS-myc-IR* (2947).

#### Genotypes

##### Figure 1

(A-A''') *UAS-dicer2/+; tub-gal80<sup>ts</sup>/+; how-gal4/+*

(B-B''', I) *UAS-dicer2/+; tub-gal80<sup>ts</sup>/UAS-wg-IR; how-gal4/UAS-wg-IR*

(C, C') *UAS-dicer2/+; escargot-gal4, UAS-gfp/ tub-gal80<sup>ts</sup>; how-gal4/UAS-wg-IR*

(D-F') *UAS-dicer2/+; escargot-gal4, UAS-gfp/+; tub-gal80<sup>ts</sup>/+*

(G-H') *UAS-dicer2/+; escargot-gal4, UAS-gfp/UAS-wg-IR; tub-gal80<sup>ts</sup>/UAS-wg-IR*

(J, K) *MyoIA-gal4/+; UAS-gfp, tub-gal80<sup>ts</sup>/+*

(L) *MyoIA-gal4/UAS-wg-IR; UAS-gfp, tub-gal80<sup>ts</sup>/UAS-wg-IR*

## Figure 2

(Panels A-I):

*UAS-dicer2/+; escargot-gal4, UAS-gfp/+; tub-gal80<sup>ts</sup>/+*

*UAS-dicer2/+; escargot-gal4, UAS-gfp/UAS-wg-IR; tub-gal80<sup>ts</sup>/UAS-wg-IR*

*UAS-dicer2/+; escargot-gal4, UAS-gfp/UAS-wg-IR<sup>KK</sup>; tub-gal80<sup>ts</sup>/+*

*UAS-dicer2/+; escargot-gal4, UAS-gfp/UAS-wls-IR<sup>KK</sup>; tub-gal80<sup>ts</sup>/+*

(Panel J):

*UAS-dicer2/+; tub-gal80<sup>ts</sup>/UAS-CD8-gfp; how-gal4/+*

*UAS-dicer2/+; tub-gal80<sup>ts</sup>/UAS-wg-IR; how-gal4/UAS-wg-IR*

*UAS-dicer2/+; tub-gal80<sup>ts</sup>/UAS-wg-IR<sup>KK</sup>; how-gal4/+*

*UAS-dicer2/+; tub-gal80<sup>ts</sup>/UAS-wls-IR<sup>KK</sup>; how-gal4/+*

(Panel K):

*mef2-gal4/+; tub-gal80<sup>ts</sup>/+*

*UAS-dicer2/+; mef2-gal4; tub-gal80<sup>ts</sup>; +/UAS-wg-IR*

(Panel L):

*yw; escargot-gal4, UAS-gfp/tub-gal80<sup>ts</sup>; how-gal4/+*

*UAS-dicer2/+; escargot-gal4, UAS-gfp/tub-gal80<sup>ts</sup>; how-gal4/UAS-wg-IR*

(Panel M):

*y,w; escargot-gal4, UAS-gfp/Cyo; tub-gal80<sup>ts</sup>/+*

*wg<sup>CX4</sup>/Cyo*

(Panel N):

*MyoIA-gal4/+; UAS-gfp, tub-gal80<sup>ts</sup>/+*

*MyoIA-gal4/UAS-wg-IR; UAS-gfp, tub-gal80<sup>ts</sup>/UAS-wg-IR*

*MyoIA-gal4/UAS-wg-IR<sup>KK</sup>; UAS-gfp, tub-gal80<sup>ts</sup>/+*

### Figure 3

Panels (A-L, N-R):

*w<sup>-</sup>; esg-gal4, tub-gal80<sup>ts</sup>, UAS-gfp/+; UAS-flp, act>CD2>gal4/+*

*w<sup>-</sup>; esg-gal4, tub-gal80<sup>ts</sup>, UAS-gfp/UAS-wg-IR; UAS-flp, act>CD2>gal4/UAS-wg-IR*

*w<sup>-</sup>; esg-gal4, tub-gal80<sup>ts</sup>, UAS-gfp/UAS-wg-IR<sup>KK</sup>; UAS-flp, act>CD2>gal4/+*

*w<sup>-</sup>; esg-gal4, tub-gal80<sup>ts</sup>, UAS-gfp/UAS-wls-IR<sup>KK</sup>; UAS-flp, act>CD2>gal4/+*

(Panel M):

*yw; escargot-gal4, UAS-gfp/+; tub-gal80<sup>ts</sup>/+*

*UAS-dicer2/+; escargot-gal4, UAS-gfp/UAS-wg-IR; tub-gal80<sup>ts</sup>/UAS-wg-IR*

*wg<sup>CX4</sup>/Cyo*

*UAS-dicer2/+; tub-gal80<sup>ts</sup>/UAS-CD8-gfp; how-gal4/+*

*UAS-dicer2/+; tub-gal80<sup>ts</sup>/UAS-wg-IR; how-gal4/UAS-wg-IR*

### Figure 4

(A, B, E) *yw, hs-flp, tub-gal4, UAS-gfp(nls)/+; tub-gal80 FRT2A/FRT2A*

(C, D, E) *yw, hs-flp, tub-gal4, UAS-gfp(nls)/+; tub-gal80 FRT2A/fz<sup>H51</sup>, fz2<sup>C1</sup> FRT2A*

(F, G, J) *y, w, hsFlp/+; UAS-CD8-gfp, tub-gal4/+; FRT82B, tub-gal80/Lac-Z, FRT82B*

(H, I, J) *y, w, hsFlp/+; UAS-CD8-gfp, tub-gal4/+; FRT82B, tub-gal80/pygo<sup>S123</sup>, FRT82B*

(Panels K-Q):

*w<sup>-</sup>; esg-gal4, tub-gal80<sup>ts</sup>, UAS-gfp/+; UAS-flp, act>CD2>gal4/+*

*w<sup>-</sup>; esg-gal4, tub-gal80<sup>ts</sup>, UAS-gfp/+; UAS-flp, act>CD2>gal4/UAS-Tfc<sup>DN</sup>*

(Panel R):

*yw; escargot-gal4, UAS-gfp/+; tub-gal80<sup>ts</sup>/+*

*yw; escargot-gal4, UAS-gfp/+; tub-gal80<sup>ts</sup>/UAS-Tcf<sup>DN</sup>*

## Figure 5

(A-C') *yw; escargot-gal4, UAS-gfp/+; tub-gal80<sup>ts</sup>/+*

(D) *yw; escargot-gal4, UAS-gfp/UAS-wg-IR; tub-gal80<sup>ts</sup>/UAS-wgIR*

(Panels E-K):

*w<sup>-</sup>; esg-gal4, tub-gal80<sup>ts</sup>, UAS-gfp/+; UAS-flp, act>CD2>gal4/+*

*w<sup>-</sup>; esg-gal4, tub-gal80<sup>ts</sup>, UAS-gfp/UAS-myc-IR; UAS-flp, act>CD2>gal4/+*

(Panel L):

*yw; escargot-gal4, UAS-gfp/+; tub-gal80<sup>ts</sup>/+*

*dm<sup>4</sup>/+; escargot-gal4, UAS-gfp/+; tub-gal80<sup>ts</sup>/+*

*dm<sup>G0139</sup>/+; escargot-gal4, UAS-gfp/+; tub-gal80<sup>ts</sup>/+*

(Panel M):

*yw; escargot-gal4, UAS-gfp/+; tub-gal80<sup>ts</sup>/+*

*yw; escargot-gal4, UAS-gfp/UAS-myc-IR; tub-gal80<sup>ts</sup>/+*

*dm<sup>4</sup>/+; escargot-gal4, UAS-gfp/+; tub-gal80<sup>ts</sup>/+*

*dm<sup>G0139</sup>/+; escargot-gal4, UAS-gfp/+; tub-gal80<sup>ts</sup>/+*

## Figure 6

(A-D', I) *Su(H)GBE-gal4, UAS-CD8-gfp/tub-gal80<sup>ts</sup>; +/+*

(E-H', I) *UAS-dicer2/+; Su(H)GBE-gal4, UAS-CD8-gfp/tub-gal80<sup>ts</sup>; UAS-wg-IR/+*

(I) *Su(H)GBE-gal4, UAS-CD8-gfp/UAS-myc-IR, tub-gal80<sup>ts</sup>; +/+*

## Figure 7

(A, A', E, F) *yw; escargot-gal4, UAS-gfp/+; tub-gal80<sup>ts</sup>/+*

(B, B', E) *yw; escargot-gal4, UAS-gfp/UAS-hep<sup>act</sup>; tub-gal80<sup>ts</sup>/+*

(C, C') *yw; escargot-gal4, UAS-gfp/ UAS-hep<sup>wt</sup>; tub-gal80<sup>ts</sup>/+*

(D, D') *MyoIA-gal4/ UAS-hep<sup>wt</sup>; UAS-gfp, tub-gal80<sup>ts</sup>/+*

(Panel G):

*UAS-dicer2/+; escargot-gal4, UAS-gfp/UAS-hep<sup>wt</sup>; tub-gal80<sup>ts</sup>/+*

*UAS-dicer2/+; escargot-gal4, UAS-gfp/UAS-hep<sup>wt</sup>; tub-gal80<sup>ts</sup>/UAS-wgIR*

*UAS-dicer2/+; escargot-gal4, UAS-gfp/UAS-hep<sup>wt</sup>; tub-gal80<sup>ts</sup>/UAS-Tcf<sup>DN</sup>*

*UAS-dicer2/+; escargot-gal4, UAS-gfp/+; tub-gal80<sup>ts</sup>/UAS-wg-IR*

*UAS-dicer2/+; escargot-gal4, UAS-gfp/+; tub-gal80<sup>ts</sup>/UAS-Ttcf<sup>DN</sup>*

### Figure 8

(A, D', I, J) *yw; escargot-gal4, UAS-gfp/+; tub-gal80<sup>ts</sup>/+*

(E, G, I, J) *UAS-dicer2/+; escargot-gal4, UAS-gfp/UAS-wg-IR; tub-gal80<sup>ts</sup>/+*

(F, H, I, J) *dm<sup>4</sup>/+; escargot-gal4, UAS-gfp/+; tub-gal80<sup>ts</sup>/+*

(Panels I, J):

*UAS-dicer2/+; tub-gal80<sup>ts</sup>/UAS-wg-IR; how-gal4/+*

*wg<sup>CX4</sup>/Cyo*

*dm<sup>G0139</sup>/+; escargot-gal4, UAS-gfp/+; tub-gal80<sup>ts</sup>/+*

### Figure S1

(Panel A):

*UAS-dicer2/+; tub-gal80<sup>ts</sup>/+; how-gal4/+*

*UAS-dicer2/+; tub-gal80<sup>ts</sup>/UAS-wg-IR; how-gal4/UAS-wg-IR*

(Panels B-H'):

*UAS-dicer2/+; escargot-gal4, UAS-gfp/+; tub-gal80<sup>ts</sup>/+*

*UAS-dicer2/+; escargot-gal4, UAS-gfp/UAS-wg-IR; tub-gal80<sup>ts</sup>/UAS-wg-IR*

*UAS-dicer2/+; escargot-gal4, UAS-gfp/UAS-wg-IR<sup>KK</sup>; tub-gal80<sup>ts</sup>/+*

(I) *UAS-dicer2/+; tub-gal80<sup>ts</sup>/UAS-wg-IR<sup>KK</sup>; how-gal4/+*

(Panels J-N’):

*MyoIA-gal4/+; UAS-gfp, tub-gal80<sup>ts</sup>/+*

*MyoIA-gal4/UAS-wg-IR; UAS-gfp, tub-gal80<sup>ts</sup>/UAS-wg-IR*

Figure S2

(Panel A):

*UAS-dicer2/+; escargot-gal4, UAS-gfp/+; tub-gal80<sup>ts</sup>/+*

*UAS-dicer2/+; escargot-gal4, UAS-gfp/UAS-wg-IR; tub-gal80<sup>ts</sup>/ UAS-wg-IR*

*UAS-dicer2/+; escargot-gal4, UAS-gfp/UAS-wg-IR<sup>KK</sup>; tub-gal80<sup>ts</sup>/+*

*UAS-dicer2/+; escargot-gal4, UAS-gfp/UAS-wls-IR<sup>KK</sup>; tub-gal80<sup>ts</sup>/ +*

(Panel B):

*UAS-dicer2/+; tub-gal80<sup>ts</sup>/ UAS-CD8-gfp; how-gal4/+*

*UAS-dicer2/+; tub-gal80<sup>ts</sup>/UAS-wg-IR; how-gal4/UAS-wg-IR*

*UAS-dicer2/+; tub-gal80<sup>ts</sup>/ UAS-wls-IR<sup>KK</sup>; how-gal4/+*

(C, C’) *mef2-gal4/+; tub-gal80<sup>ts</sup>/+*

(D, D’) *UAS-dicer2/+; mef2-gal4/ tub-gal80<sup>ts</sup>; +/UAS-wg-IR*

(E, E’) *UAS-dicer2/+; escargot-gal4, UAS-gfp/ tub-gal80<sup>ts</sup>; how-gal4/+*

(F, F’) *UAS-dicer2/+; escargot-gal4, UAS-gfp/ tub-gal80<sup>ts</sup>; how-gal4/UAS-wg-IR*

(Panel G):

*MyoIA-gal4/+; UAS-gfp, tub-gal80<sup>ts</sup>/+*

*MyoIA-gal4/UAS-wg-IR; UAS-gfp, tub-gal80<sup>ts</sup>/UAS-wg-IR*

*MyoIA-gal4/UAS-wg-IR<sup>KK</sup>; UAS-gfp, tub-gal80<sup>ts</sup>/+*

Figure S3:

(A, B) *UAS-dicer2/+; escargot-gal4, UAS-gfp/+; tub-gal80<sup>ts</sup>/+*

(C, D) *UAS-dicer2/+; escargot-gal4, UAS-gfp/UAS-wg-IR; tub-gal80<sup>ts</sup>/ UAS-wg-IR*

(E, F) *wg<sup>CX4</sup>/Cyo*

(G, H) *UAS-dicer2/+; tub-gal80<sup>ts</sup>/+; how-gal4/+*

(I, J) *UAS-dicer2/+; tub-gal80<sup>ts</sup>/UAS-wg-IR; how-gal4/UAS-wg-IR*

(Panels K, Q):

*yw; escargot-gal4, UAS-gfp/tub-gal80<sup>ts</sup>; how-gal4/+*

*UAS-dicer2/+; escargot-gal4, UAS-gfp/tub-gal80<sup>ts</sup>; how-gal4/UAS-wg-IR*

#### Figure S4

(A-D, M) *yw; escargot-gal4, UAS-gfp/+; tub-gal80<sup>ts</sup>/+*

(E-M) *yw; escargot-gal4, UAS-gfp/+; tub-gal80<sup>ts</sup>/UAS-Tcf<sup>DN</sup>*

#### Figure S5

(A-E, J, K) *yw; escargot-gal4, UAS-gfp/+; tub-gal80<sup>ts</sup>/+*

(F, G) *dm<sup>4</sup>/+; escargot-gal4, UAS-gfp/+; tub-gal80<sup>ts</sup>/+*

(C, H, I, L, M) *yw; escargot-gal4, UAS-gfp/UAS-myc-IR; tub-gal80<sup>ts</sup>/+*

#### Figure S6

(A-C') *yw; escargot-gal4, UAS-gfp/+; tub-gal80<sup>ts</sup>/+*

(D-E) *UAS-dicer2; escargot-gal4, UAS-gfp/UAS-hep<sup>wt</sup>; tub-gal80<sup>ts</sup>/+*

(F) *UAS-dicer2/+; escargot-gal4, UAS-gfp/UAS-hep<sup>wt</sup>; tub-gal80<sup>ts</sup>/UAS-wgIR*

(G) *UAS-dicer2/+; escargot-gal4, UAS-gfp/UAS-hep<sup>wt</sup>; tub-gal80<sup>ts</sup>/UAS-Tcf<sup>DN</sup>*

(H) *UAS-dicer2/+; escargot-gal4, UAS-gfp/+; tub-gal80<sup>ts</sup>/UAS-wg-IR*

(I) *UAS-dicer2/+; escargot-gal4, UAS-gfp/+; tub-gal80<sup>ts</sup>/UAS-Ttcf<sup>DN</sup>*

#### Figure S7

(A-B', E-H) *yw; escargot-gal4, UAS-gfp/+; tub-gal80<sup>ts</sup>/+*

(C-D', E-H) *UAS-dicer2/+; escargot-gal4, UAS-gfp/UAS-wg-IR; tub-gal80<sup>ts</sup>/UAS-wg-IR*

#### Figure S8

(A, A', F) *yw; escargot-gal4, UAS-gfp/UAS-Upd; tub-gal80<sup>ts</sup>/+*

(B, B', F) *yw; escargot-gal4, UAS-gfp/+; tub-gal80<sup>ts</sup>/+*

(C-E') *yw; escargot-gal4, UAS-gfp/UAS-stat-IR; tub-gal80<sup>ts</sup>/+*

(Panels G, H)

*yw; escargot-gal4, UAS-gfp/+; tub-gal80<sup>ts</sup>/+*

*UAS-Dicer2/+; escargot-gal4, UAS-gfp/UAS-wg-IR; tub-gal80<sup>ts</sup>/UAS-wg-IR*

*yw; escargot-gal4, UAS-gfp/UAS-myc-IR; tub-gal80<sup>ts</sup>/+*

*yw; escargot-gal4, UAS-gfp/+; tub-gal80<sup>ts</sup>/UAS-Tcf<sup>DN</sup>*

### Primer sequences

*rpl32* f      AGGCCCAAGATCGTGAAGAA

*rpl32* r      TGTTGCACCAGGAACTTCTTGAA

*myc* f      ATGCACATCACCGATCACAG

*myc* r      ATGGGCCATCTGGAAGTGTGTA

*wg* f      CCAACCCACGAAGTACAGA

*wg* r      CATGGATGGGGTGGTTTAAG

*upd3* f      AGGCCATCAACCTGACCAAC

*upd3* r      ACGCTTCTCCATCAGCTTGC

*socs36e* f    ATGACCGTGCACTCGCAAAT

*socs36e* r    CCTCGTAGCGGTCCATCTTG

GGATCGGTGTTGAGTTGCTT



*delta-f*

*delta-r* TGTCTCATGTACGGCGGATA

*puc-f* CATCTCGCCCAATCTGAACT

*puc-r* CCCACAGAAGATGACGAAGG

## Supplementary Figure Legends

**Figure S1. Wg is upregulated in response to diverse damages in the adult *Drosophila* midgut** (A-D) Quantitative real time PCR (RT-qPCR) for *wg* in whole midguts from the indicated genotypes. Note that VM knockdown of *wg* resulted in decreased total transcript levels in midguts (A), while knockdown in *ISCs/EBs* via *esg-gal4* had no effect (B). *wg* transcript levels increased upon intestinal damage (C), and knockdown in *ISCs/EBs* prevented the upregulation (D). (E-N') Posterior midguts expressing *gfp* alone (E, E', G, G') or in combination with RNAi for *wg*, under *esg-gal4* (F, F', H, H'), *how-gal4* (I) or *MyoIA-gal4* (J-N') drivers treated with Suc, *Pe* or Bleomycin (Bleo), were stained with anti-Wg (red). Note that the expression of *wg-IR* or *wg-IR<sup>KK</sup>* via *esg-gal4*, but not with *how-gal4* or *MyoIA-gal4*, suppressed the upregulation of Wg in response to damage. Scale bars: 40µm. Unless otherwise indicated midguts are oriented with posterior up.

**Figure S2. Wg from the ISC/EB population but not the VM or ECs is required for ISC proliferation during regeneration.** (A-B) Quantification of pH3<sup>+</sup> cells in posterior midguts expressing *gfp*, or RNAi for *wg* or *wls* under the control of the *esg-gal4* (A) or *how-gal4* (B) drivers in response to treatments with Sucrose, DSS (left panels) or Bleomycin (right panels). (C-D') Tangential sections of control midguts (C, C') or midguts expressing *wg* RNAi (D, D') under the control of the muscle specific *mef2-gal4* driver stained with Phalloidin (green) and anti-Wg antibody (red). Note the knockdown of Wg protein in muscle cells (arrows, compare D, D', with C, C'). Posterior is to the right. (E-F') Midguts overexpressing *gfp* only (E, E') or in combination with *wg* RNAi (F, F') under the control of combined *esg-gal4*, *UAS-gfp*; *how-gal4* (*esg*; *how>gfp*) drivers stained with anti-GFP (green) and anti-Wg (red). Note the knockdown of Wg protein in

*escargot* expressing cells (arrows, compare F, F', with E, E'). Posterior is up. (G) Quantification of pH3<sup>+</sup> cells in posterior midguts expressing RNAi for *wg* in ECs under the control of *MyoIA-gal4* in response to treatments with DSS (left), Bleomycin (middle) and *Pe* (right). Note that only midguts with *esg-gal4* driven *wg* or *wls* RNAi showed significant blockade in the regenerative response to damages. (\*\*\*)  $p < 0.0001$  one-way ANOVA with Bonferroni's Multiple Comparison Test). Scale bars: 20 $\mu$ m

**Figure S3. Wg is not essential for ISC maintenance.** (A-J) posterior midguts from 7 and 30 day-old flies expressing control *gfp* only or together with RNAi interference for *wg* or heterozygous for the *wg<sup>CX4</sup>* allele stained with anti-Delta (red). Note the increase in Delta<sup>+</sup> cells in aged guts (compare A with B and G with H) and the suppression of this phenotype upon *wg* knock down or heterozygosity. (K, L) Midguts carrying combined (*esg; how > gfp*) drivers stained with anti-GFP. (M-P) Control (*esg; how > gfp*) midguts (M, N) or midguts with inducible combined *wg* knock down (*esg; how<sup>ts</sup> > wg-IR*) aged and stained as in A-J. (Q) Quantification of Delta<sup>+</sup> cells ISCs in posterior midguts as in M-P. Note that combined knock down of *wg* prevents the age-dependent increase in the number of ISCs but does not lead to significant change in ISC number in 30 versus 7 day old midguts. (\* $p = 0.005$  Student's t Test). Scale bars: 40 $\mu$ m

**Figure S4. TCF is required for ISC proliferation in response to damage and long-term ISC maintenance in the adult *Drosophila* midgut.** (A-H) Posterior midguts from flies expressing *gfp* alone or a dominant negative form of TCF (*Tcf<sup>DN</sup>*) under the control of the *esg-gal4* driver, treated with Suc (A, E), *Pe* (B, F), DSS (C, G) or Bleo (D, H). Note that in all conditions *esg<sup>ts</sup> > Tcf<sup>DN</sup>* guts fail to proliferate. (I-L) *esg<sup>ts</sup> > Tcf<sup>DN</sup>* midguts after 7 and 30 days of transgene overexpression. Anti-GFP (green) and Delta staining (red)

indicates a loss of  $esg^{+ve}$  cells after 30 days (compare K, K' with I, I' and L with J). (M) Quantification of  $pH3^{+ve}$  cells in posterior midguts as in A-H. (\*\*\*)  $p < 0.0001$  one-way ANOVA with Bonferroni's Multiple Comparison Test). Note that expression of  $Tcf^{DN}$  all proliferation in response to damages. Scale bars: (A-H) 20 $\mu$ m; (I, I', K, K') 40 $\mu$ m; (J, L) 100 $\mu$ m.

**Figure S5. *Myc* is required for ISC proliferation in response to damage and long-term ISC maintenance in the adult *Drosophila* midgut.** (A-B') Posterior midguts expressing *gfp* alone or with RNAi for *dmyc* under the control of the *esg-gal4* driver treated with Suc (A, A') or Bleo (B, B') and stained with anti-Myc (A, B; red and A', B'; grey). Note the upregulation of Myc upon damage. (C) Quantification of  $pH3^{+ve}$  cells in posterior midguts expressing *gfp* or RNAi interference for *dmyc* under the control of the *esg-gal4* driver upon treatment with DSS and Bleo (\*\*\*)  $p < 0.0001$  one-way ANOVA with Bonferroni's Multiple Comparison Test). Note that *myc* knock down completely suppressed proliferation in response to damage. (D-I) 7 and 30 day-old posterior midguts expressing *gfp* or RNAi interference for *myc* under the control of the *esg-gal4* driver, or heterozygous for a loss of function allele of *dmyc* and stained with anti-Delta (red). Staining showed a suppression of the age-related ISC increase by *myc* heterozygotes (F, G) and loss of ISCs after 30 days of gene knock down in  $esg^{ts} > myc-IR$  midguts (H, I). The latter was confirmed by looking at  $esg > gfp$  progenitor cells (J-M). Arrow in I points to a single,  $\Delta^{+ve}$  ISC as confirmed by its co-localization with  $esg > gfp$  (not shown). The rest of the signal did not correspond to cells of either the expected size or  $esg > gfp^{+ve}$  (not shown) and therefore was interpreted as background. Note the age-dependent increase in  $esg^{+ve}$  cells in 30 versus 7-day old control midguts. Scale bars: (A-B', D-I) 40 $\mu$ m; (J-M) 100 $\mu$ m.

**Figure S6. Wg is downstream of JNK in response to damage in the intestine.** (A-B) Wild type midguts treated with Sucrose (A) or DSS (B) stained with anti-pJNK (red). Note that pJNK is undetectable in unchallenged tissue, but present in ECs upon tissue damage with DSS (B'; arrows). (C-D') Midguts after 2-day expression of *gfp* alone or in combination with a constitutively active form of *hemipterous* (*hep<sup>act</sup>*) under the *esg-gal4* driver, stained with anti-Myc (C, D; red and C', D'; grey). Note the increase in Myc levels in some *esg<sup>ts</sup>>hep<sup>act</sup>* cells (D, D'; arrows). (E-I) Midguts after 7-day expression of wild type *hep* (E), RNAi for *wg* (H) or *Tcf<sup>DN</sup>* (I) alone or combination of the latter two with *hep<sup>wt</sup>* (F and G), under *esg-gal4*. Note the suppression of *hep*-induced ISC proliferation by co-expression of *Tcf<sup>DN</sup>* or RNAi for *wg*. Scale bars: 20µm

**Figure S7. Wg is downstream of JNK in ageing *Drosophila* midguts**

(A-D') 7 and 30 day-old midguts of the indicated genotypes stained with anti-pJNK (red) to assess JNK activation. Note that pJNK was upregulated in ECs and big nuclei *esg<sup>+ve</sup>* cells in aged guts (B, B'; arrows). pJNK was still upregulated after 30 days of *wg* knockdown in progenitor cells by *esg-gal4* (D, D'; arrows; compare D' with B'), while the expansion of *esg<sup>+ve</sup>* cells was suppressed. (E-H) RT-qPCR of whole midguts to assess *delta*, *puckered* (*puc*), *wg* and *myc* transcript levels in control and upon *wg* knockdown by *esg-gal4*, in young (7 days of adult life) and ageing (30 days of adult life) midguts. Note that all four transcripts were upregulated in aged guts (E and F). Levels of *puc* mRNA upregulation were not significantly different in aged controls versus *esg<sup>ts</sup>>wg-IR* midguts (G), while *myc* transcript upregulation was attenuated upon *wg* knockdown (H). Scale bars: 20µm

**Figure S8. Parallel activation of Jak/Stat and Wg/Myc during midgut regeneration.**

(A-E') Midguts of the indicated genotypes were stained with anti-Wg (A, A', E, E'), or anti-Myc (B-D') after treatment with Sucrose or DSS. Note that IL-6/Upd overexpression under *esg-gal4* (to activate JAK/STAT signalling) did not affect Wg levels (A, A'). Also, unlike controls (B), *marelle/stat92E* knockdowns failed to regenerate in response to DSS treatment (see lack up expansion of the *esg>gfp* reporter in D; compared with B, C), in spite of upregulation of Myc (D'; compare with B', C') and Wg (E'; compare with basal Wg levels such as in Figure S1E'). (F) RT-qPCR of whole midguts to assess transcript levels of *wg* in midguts after 6-day expression of *gfp* only or together with *upd* under *esg-gal4* showed lack of *wg* upregulation (F). (G, H) RT-qPCR for *upd3* (G) and *socs36e* (H) in midguts of the indicated genotypes after Sucrose or DSS feeding. Midguts subject to 14-day knocking down of *wg*, *myc* or *tcf* under *esg-gal4* maintained significant upregulation of JAK/Stat signaling in response to damage in spite of their failure to regenerate. A similar result was observed after *Pe* feeding (not shown). Scale bars: 40µm

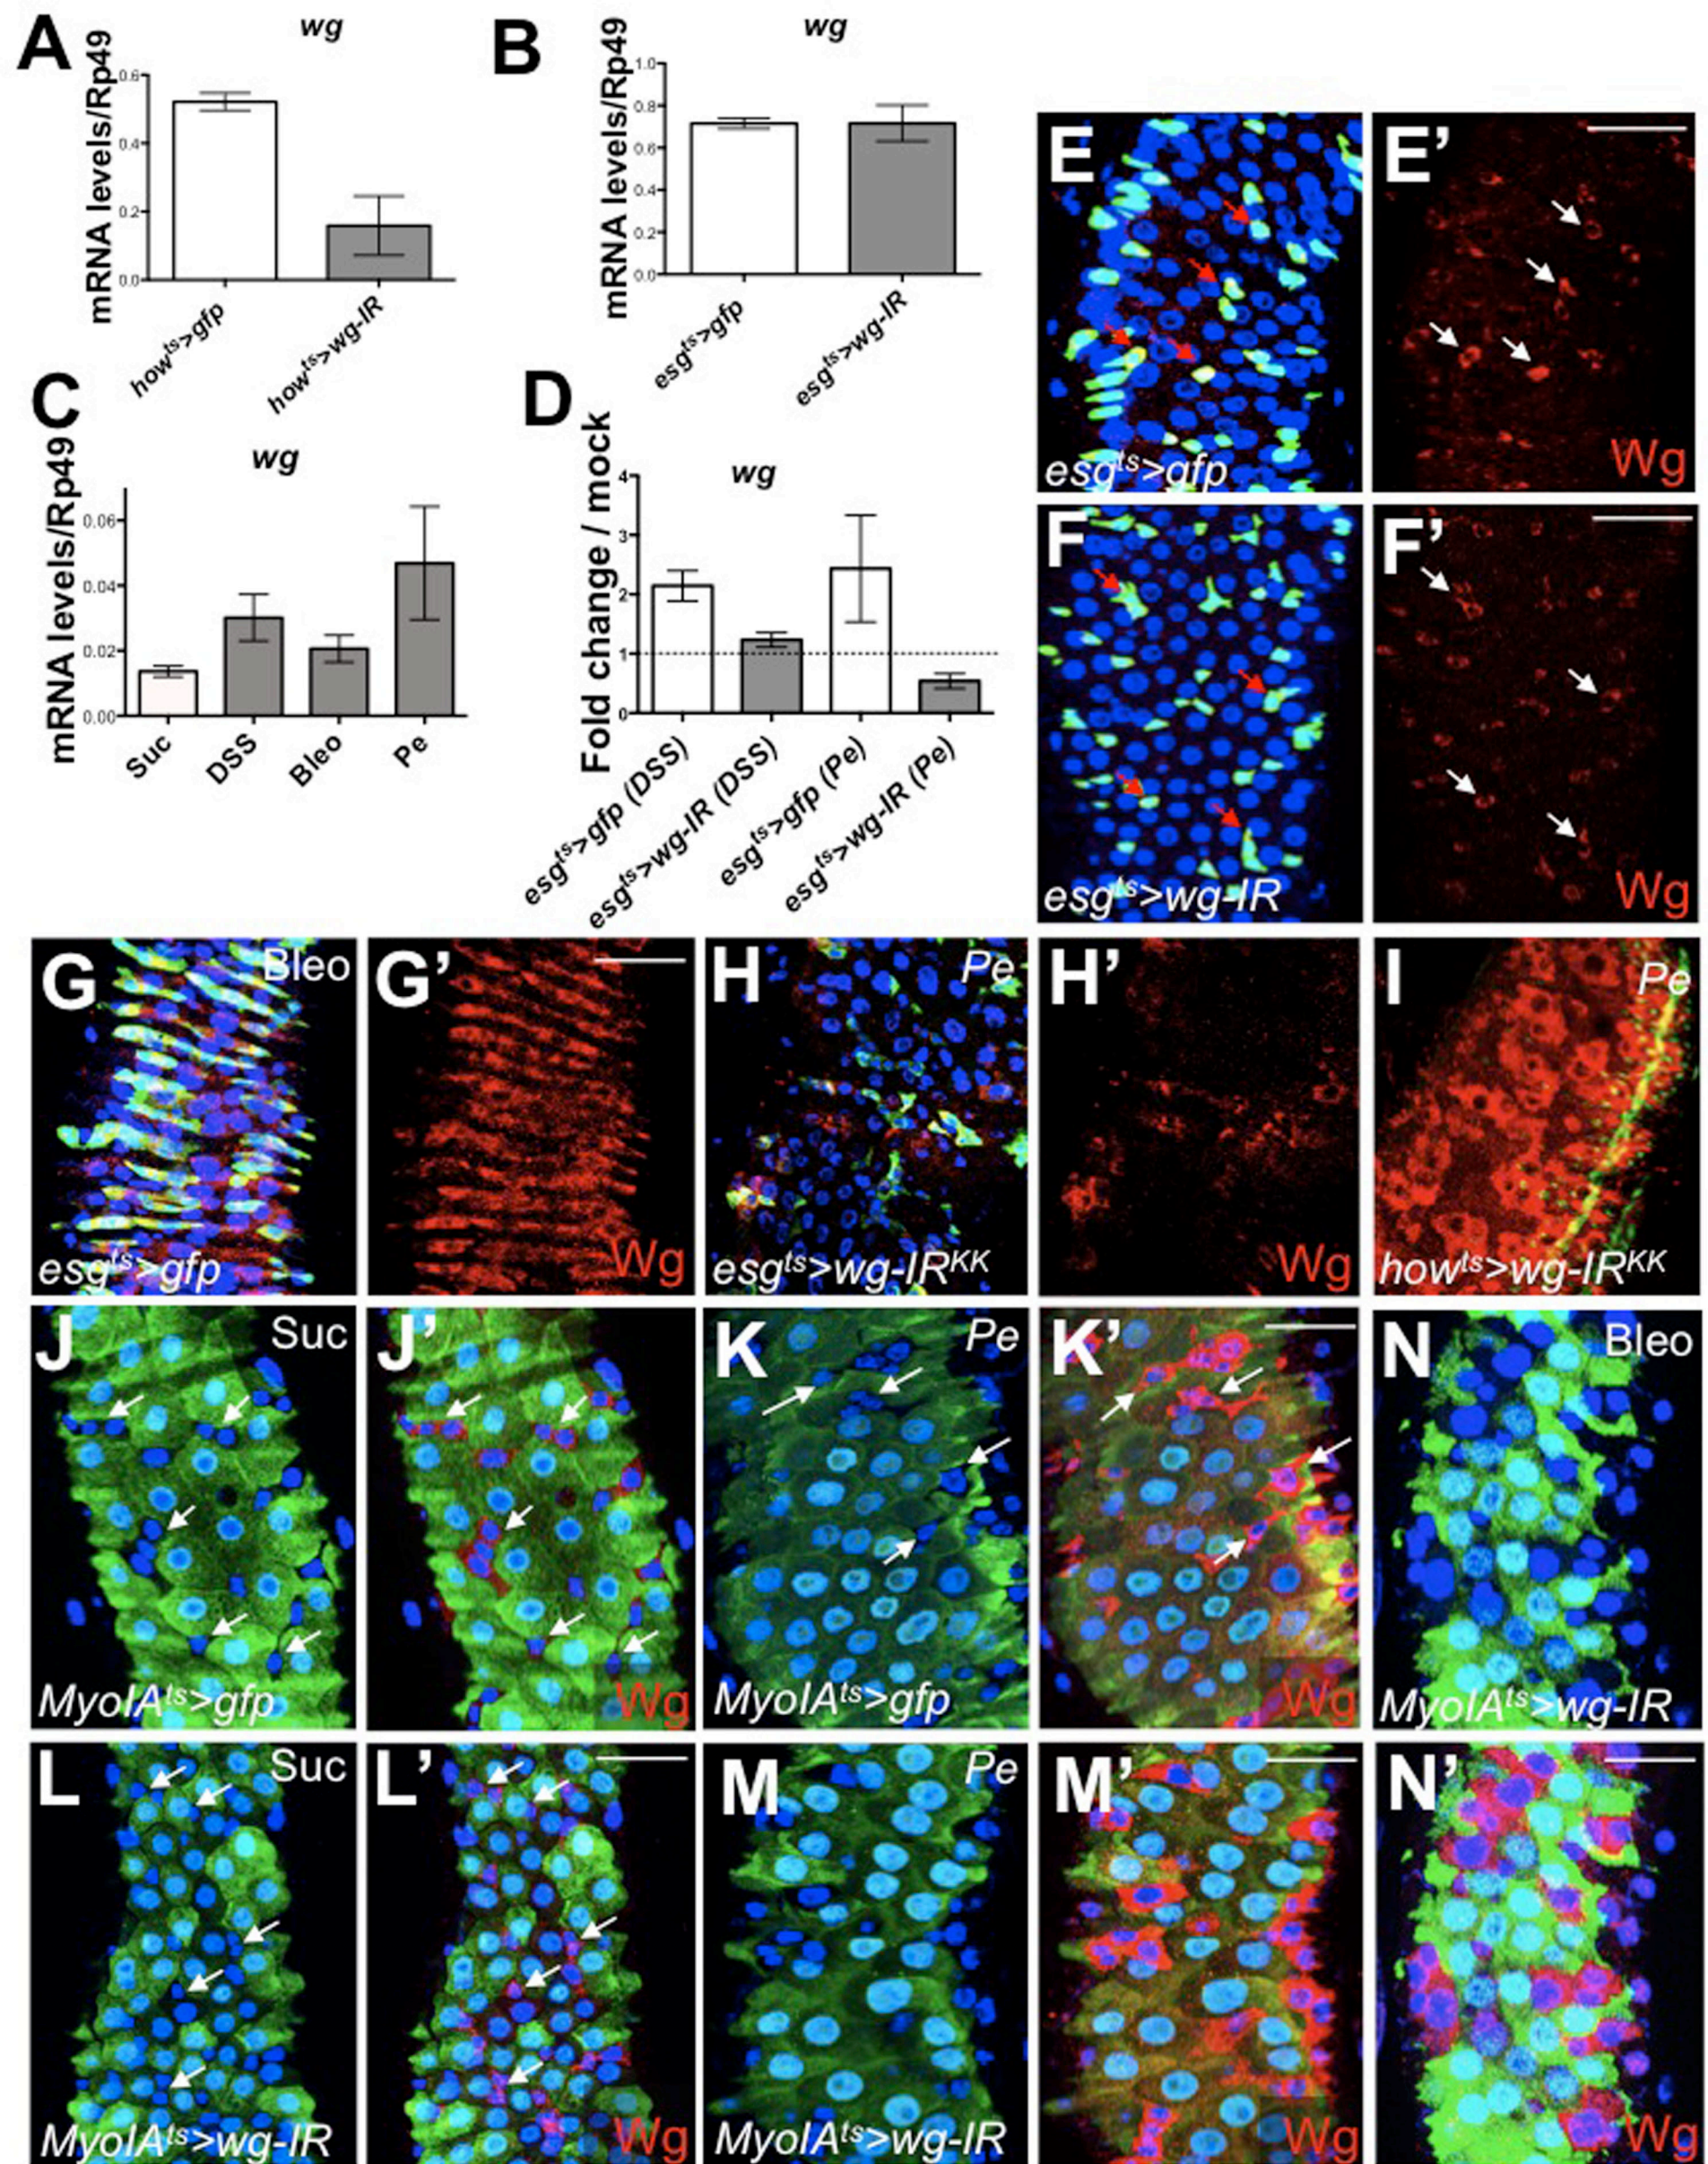

Figure S1

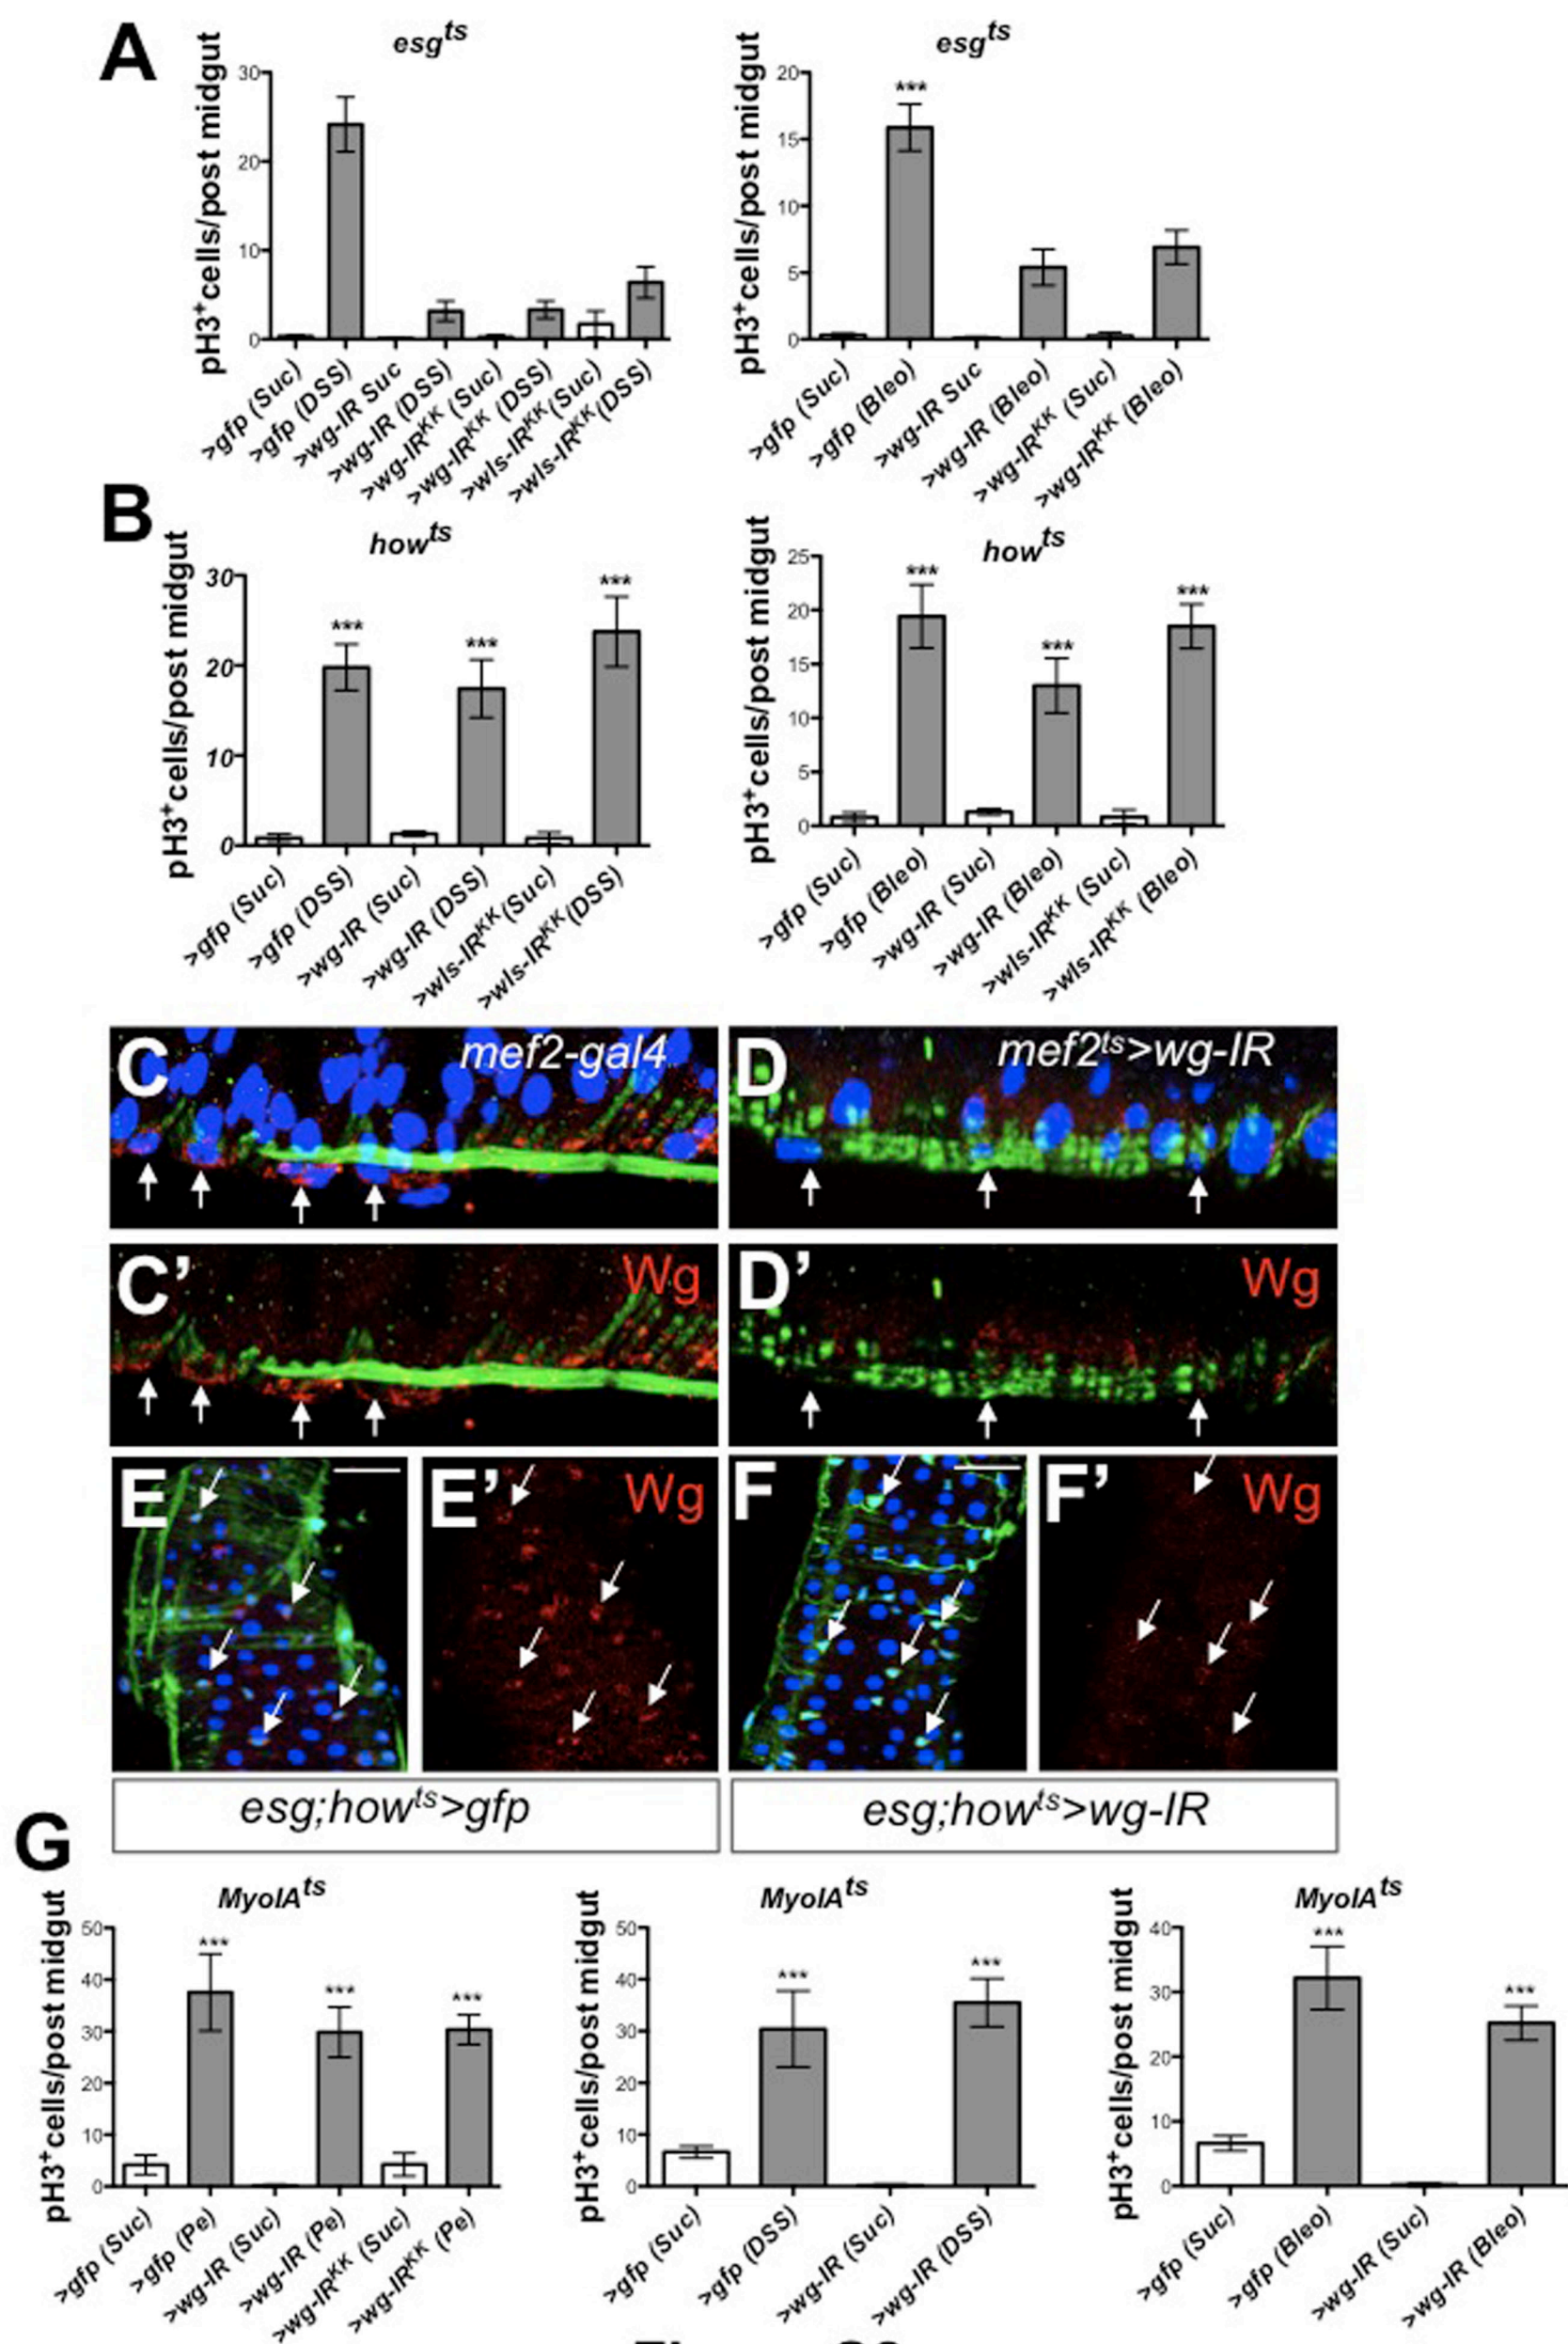



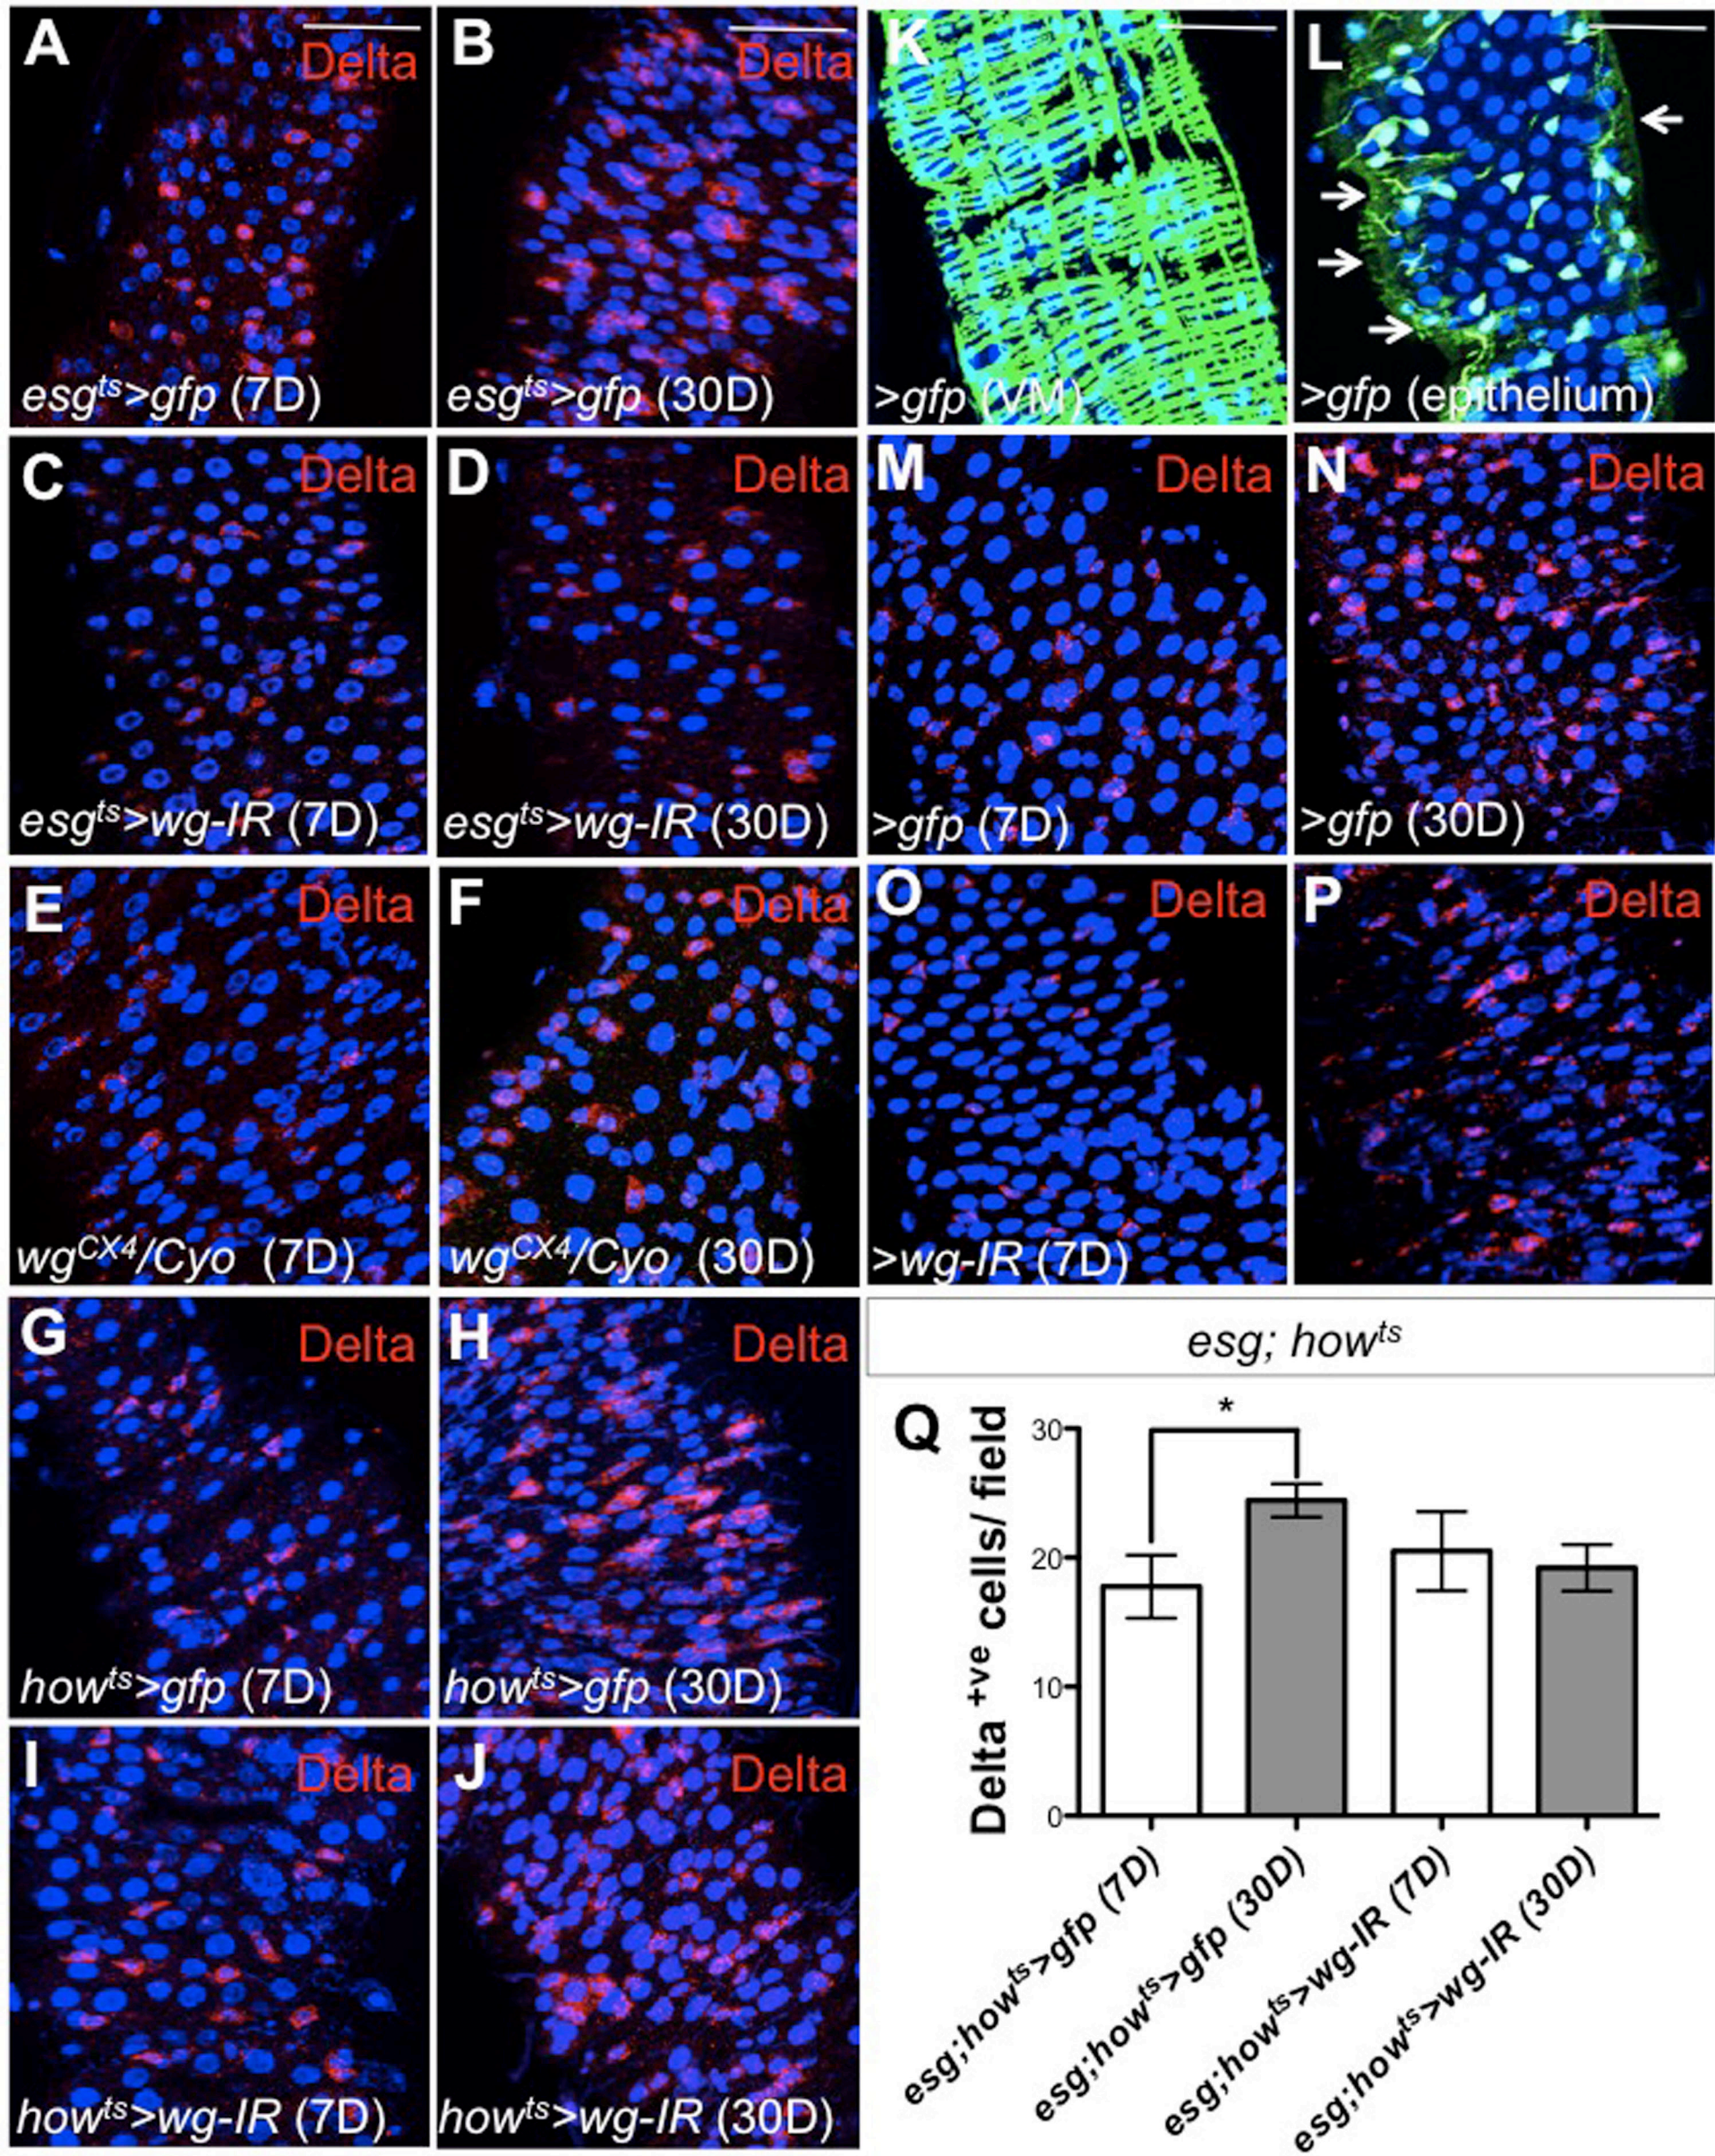

Figure S3

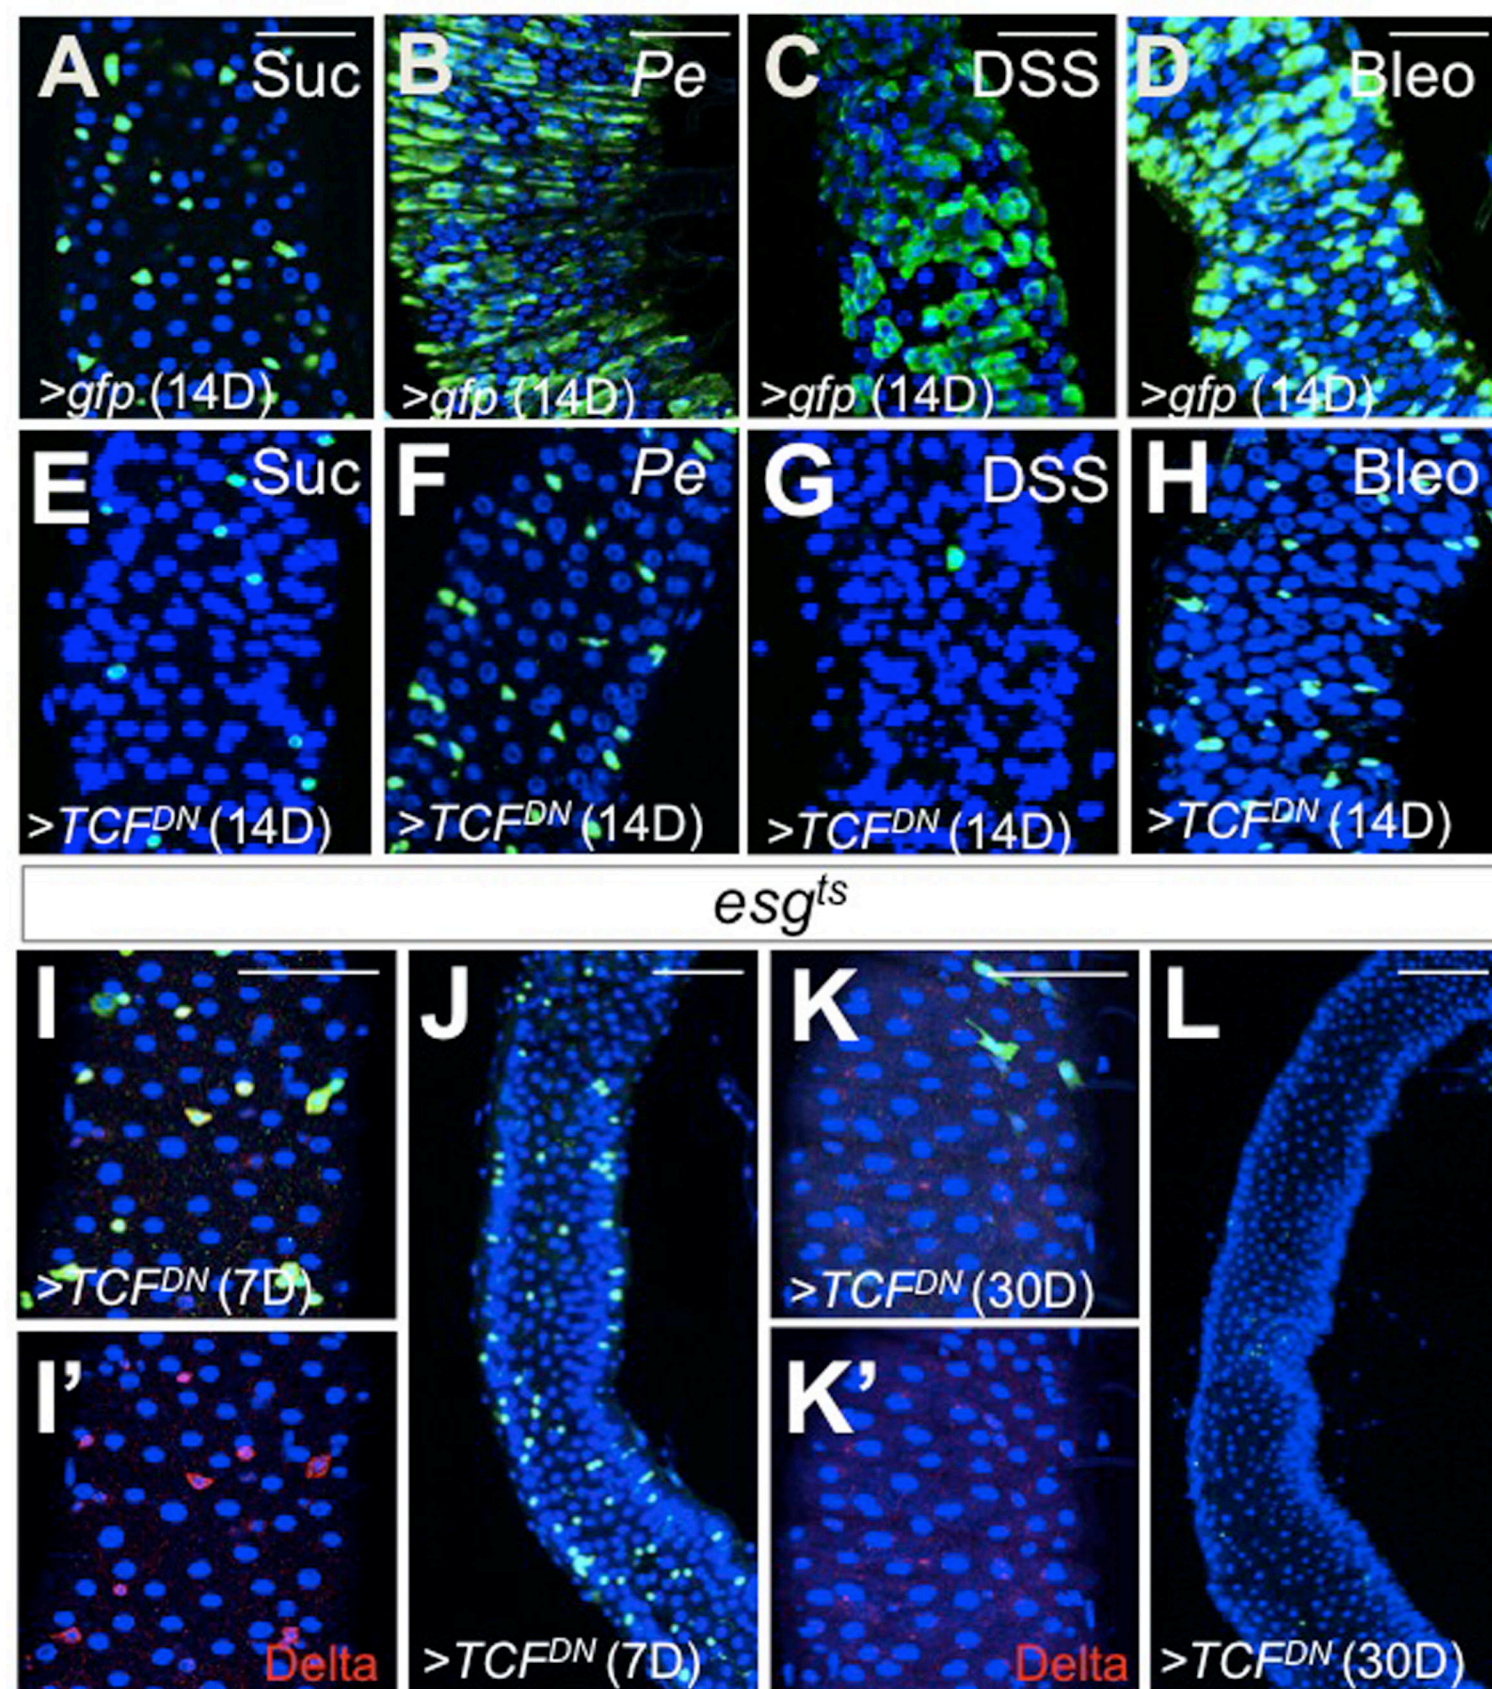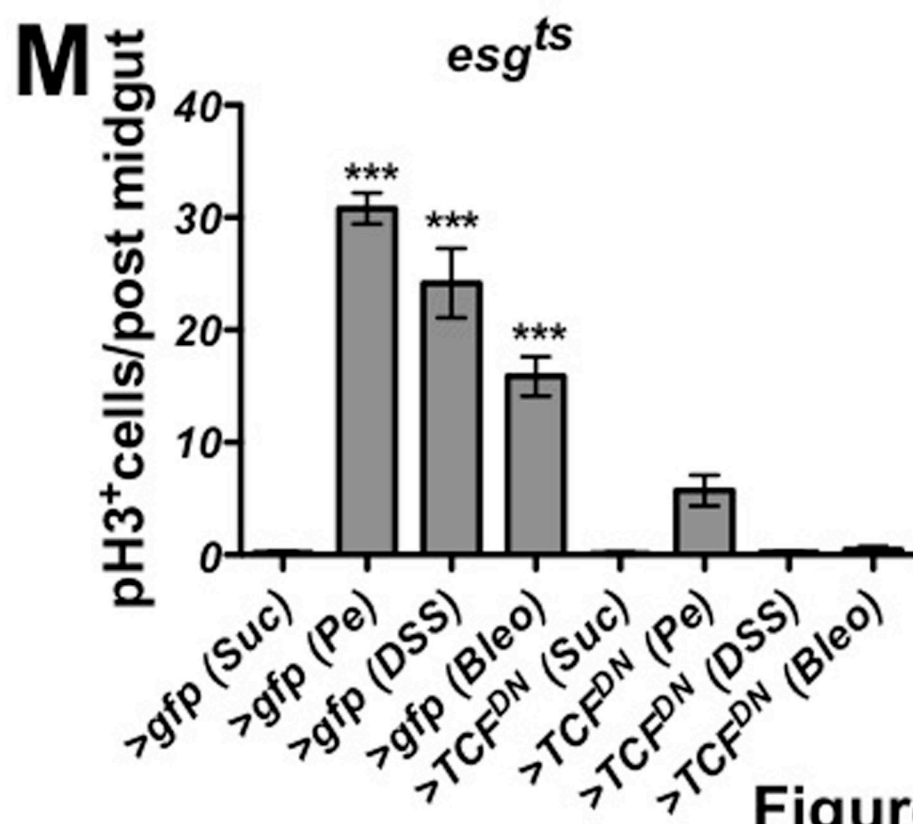

Figure S4

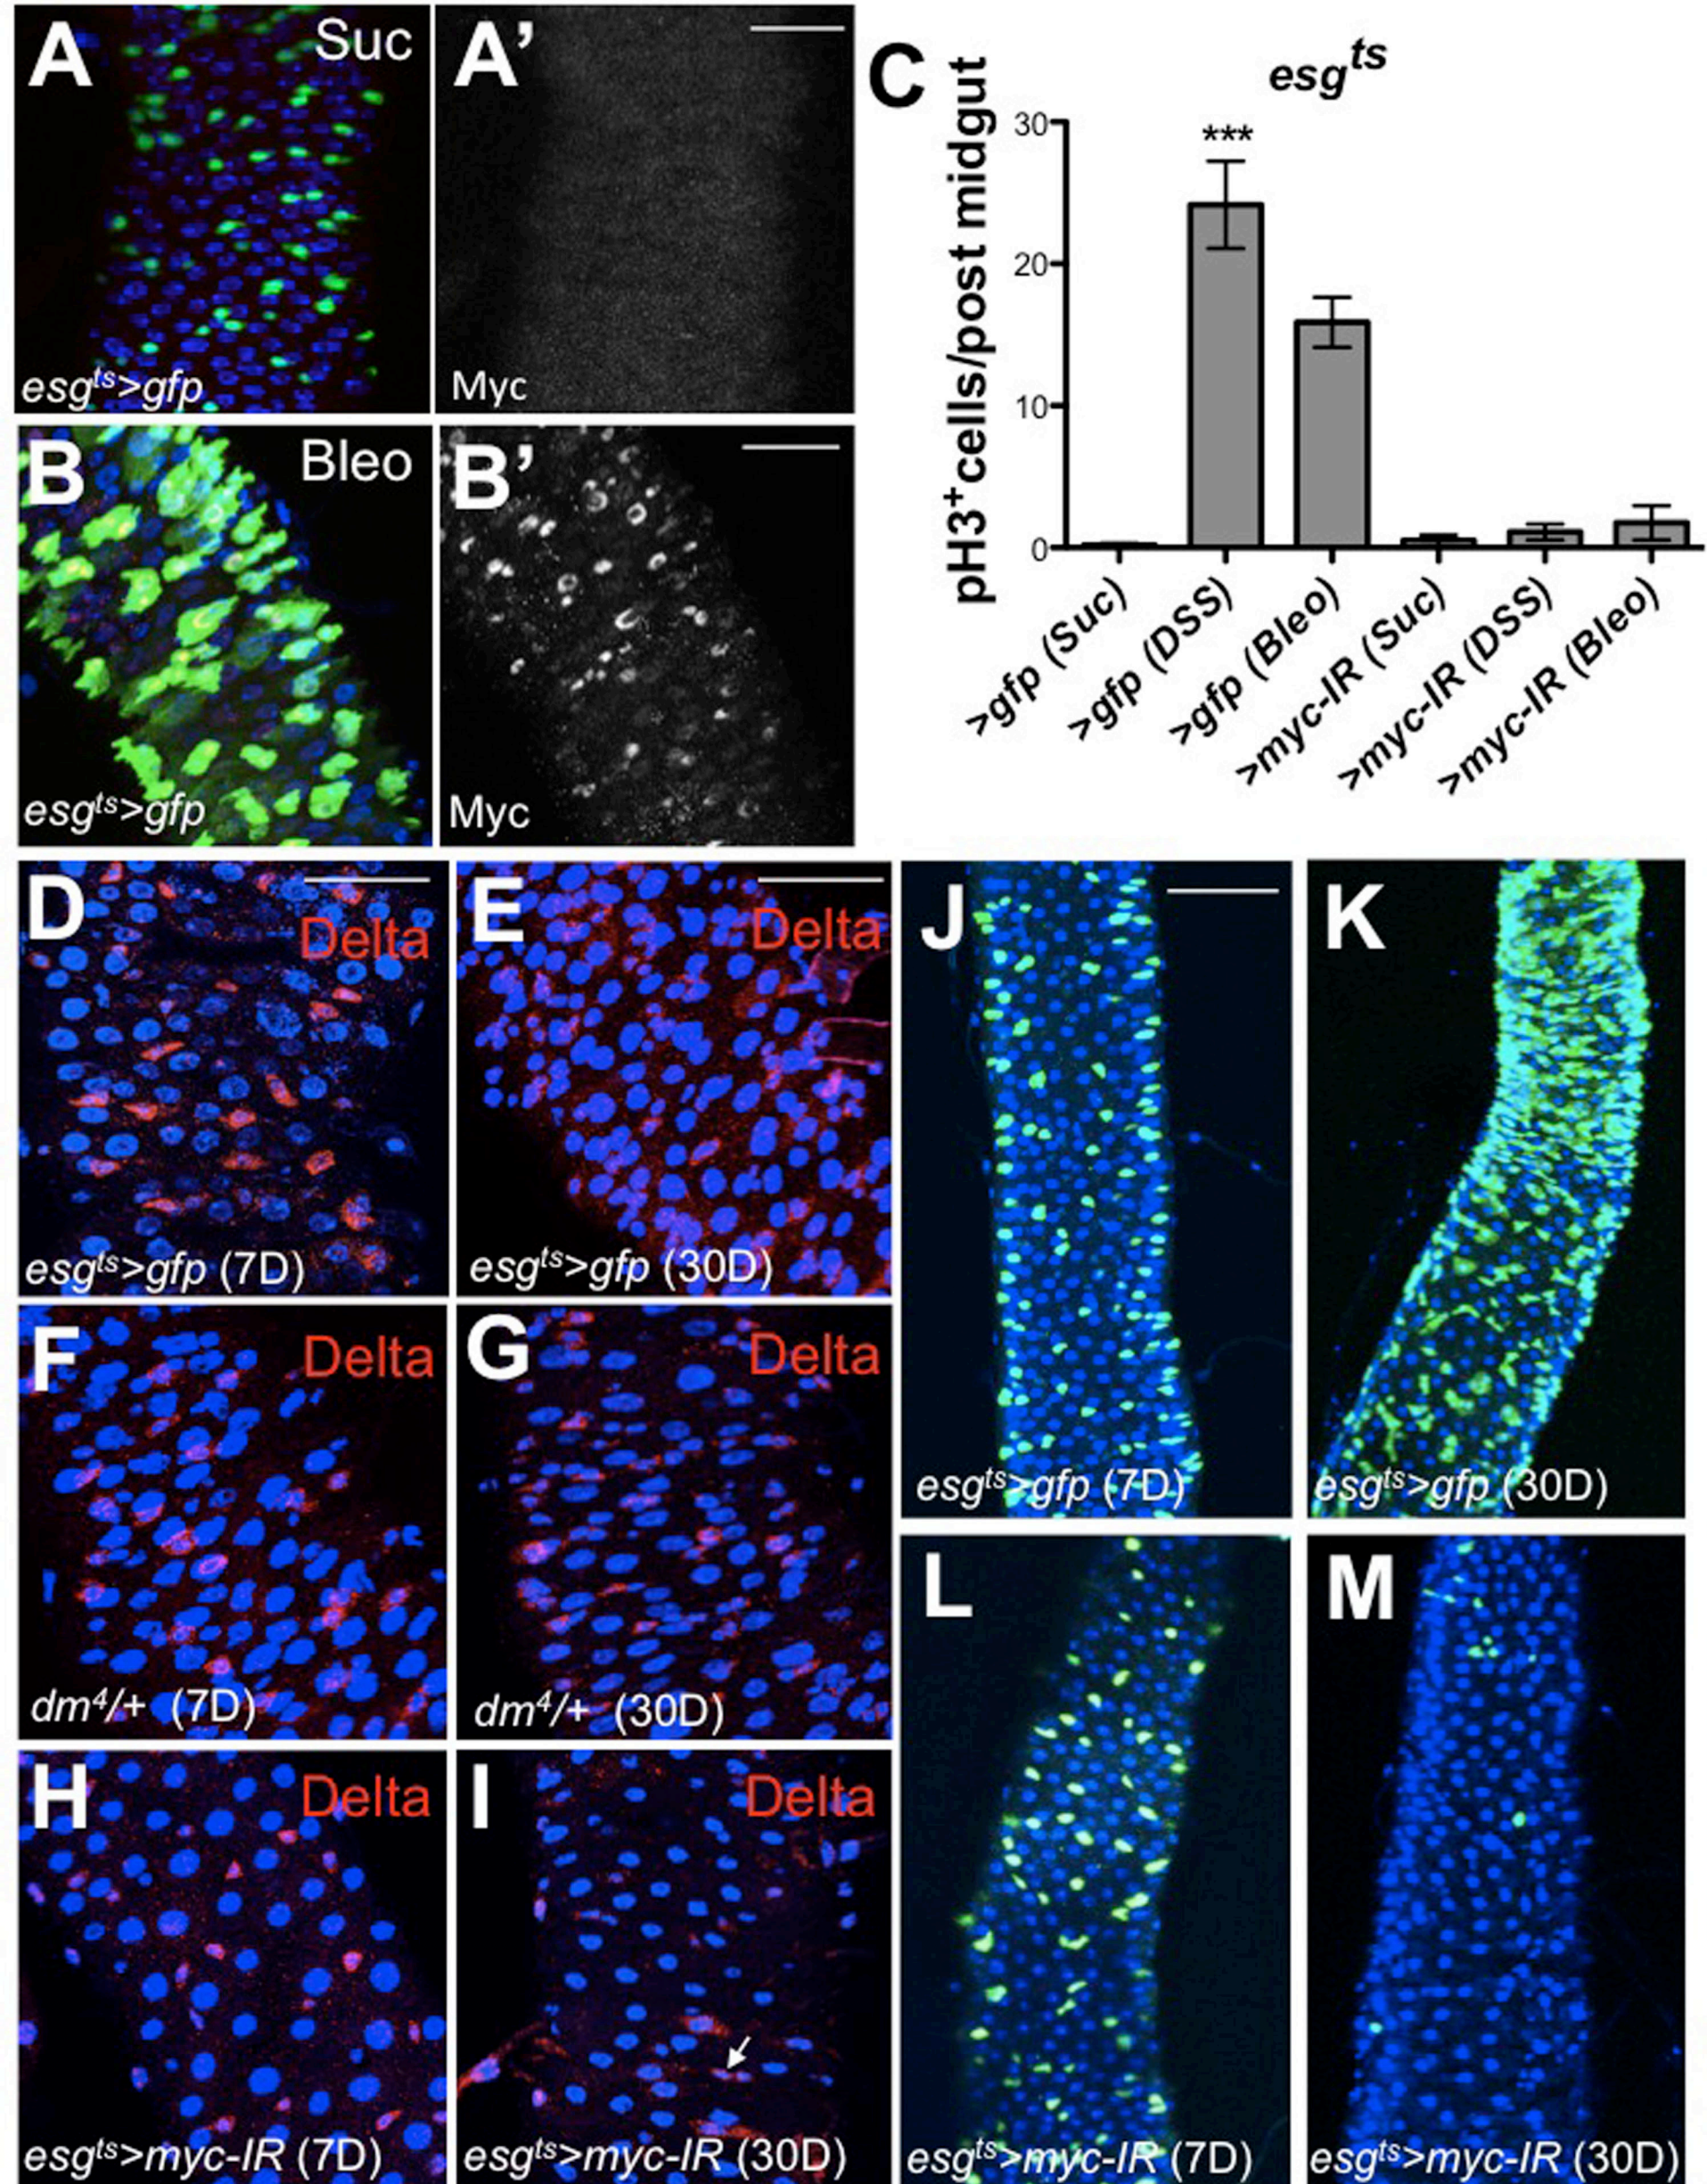

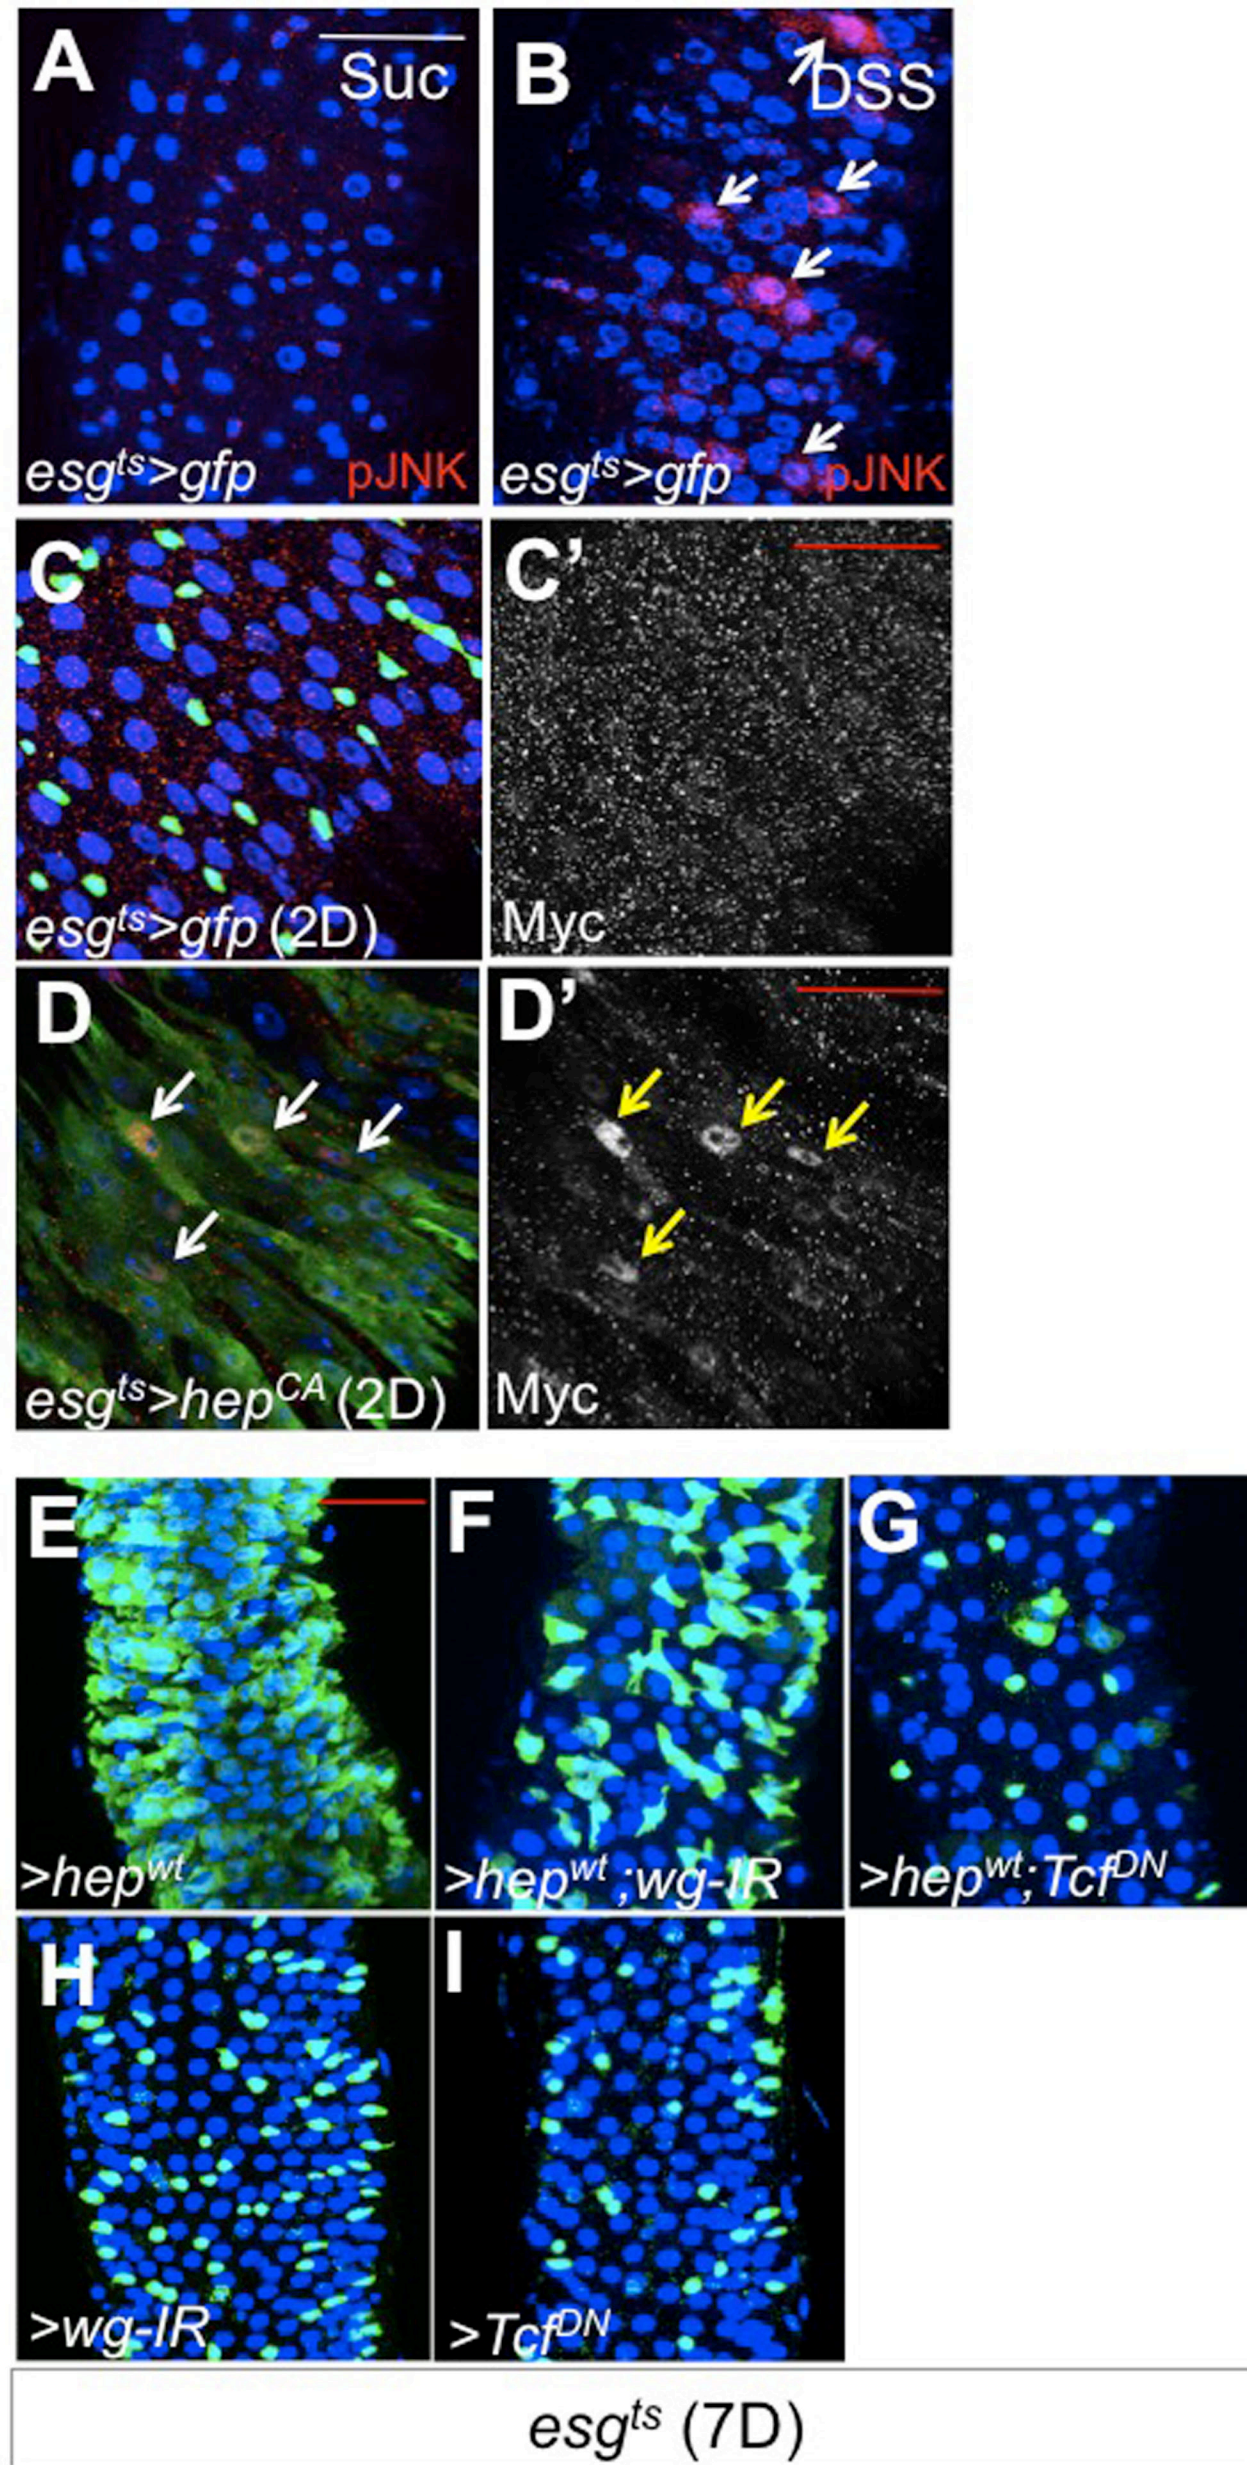

Figure S6

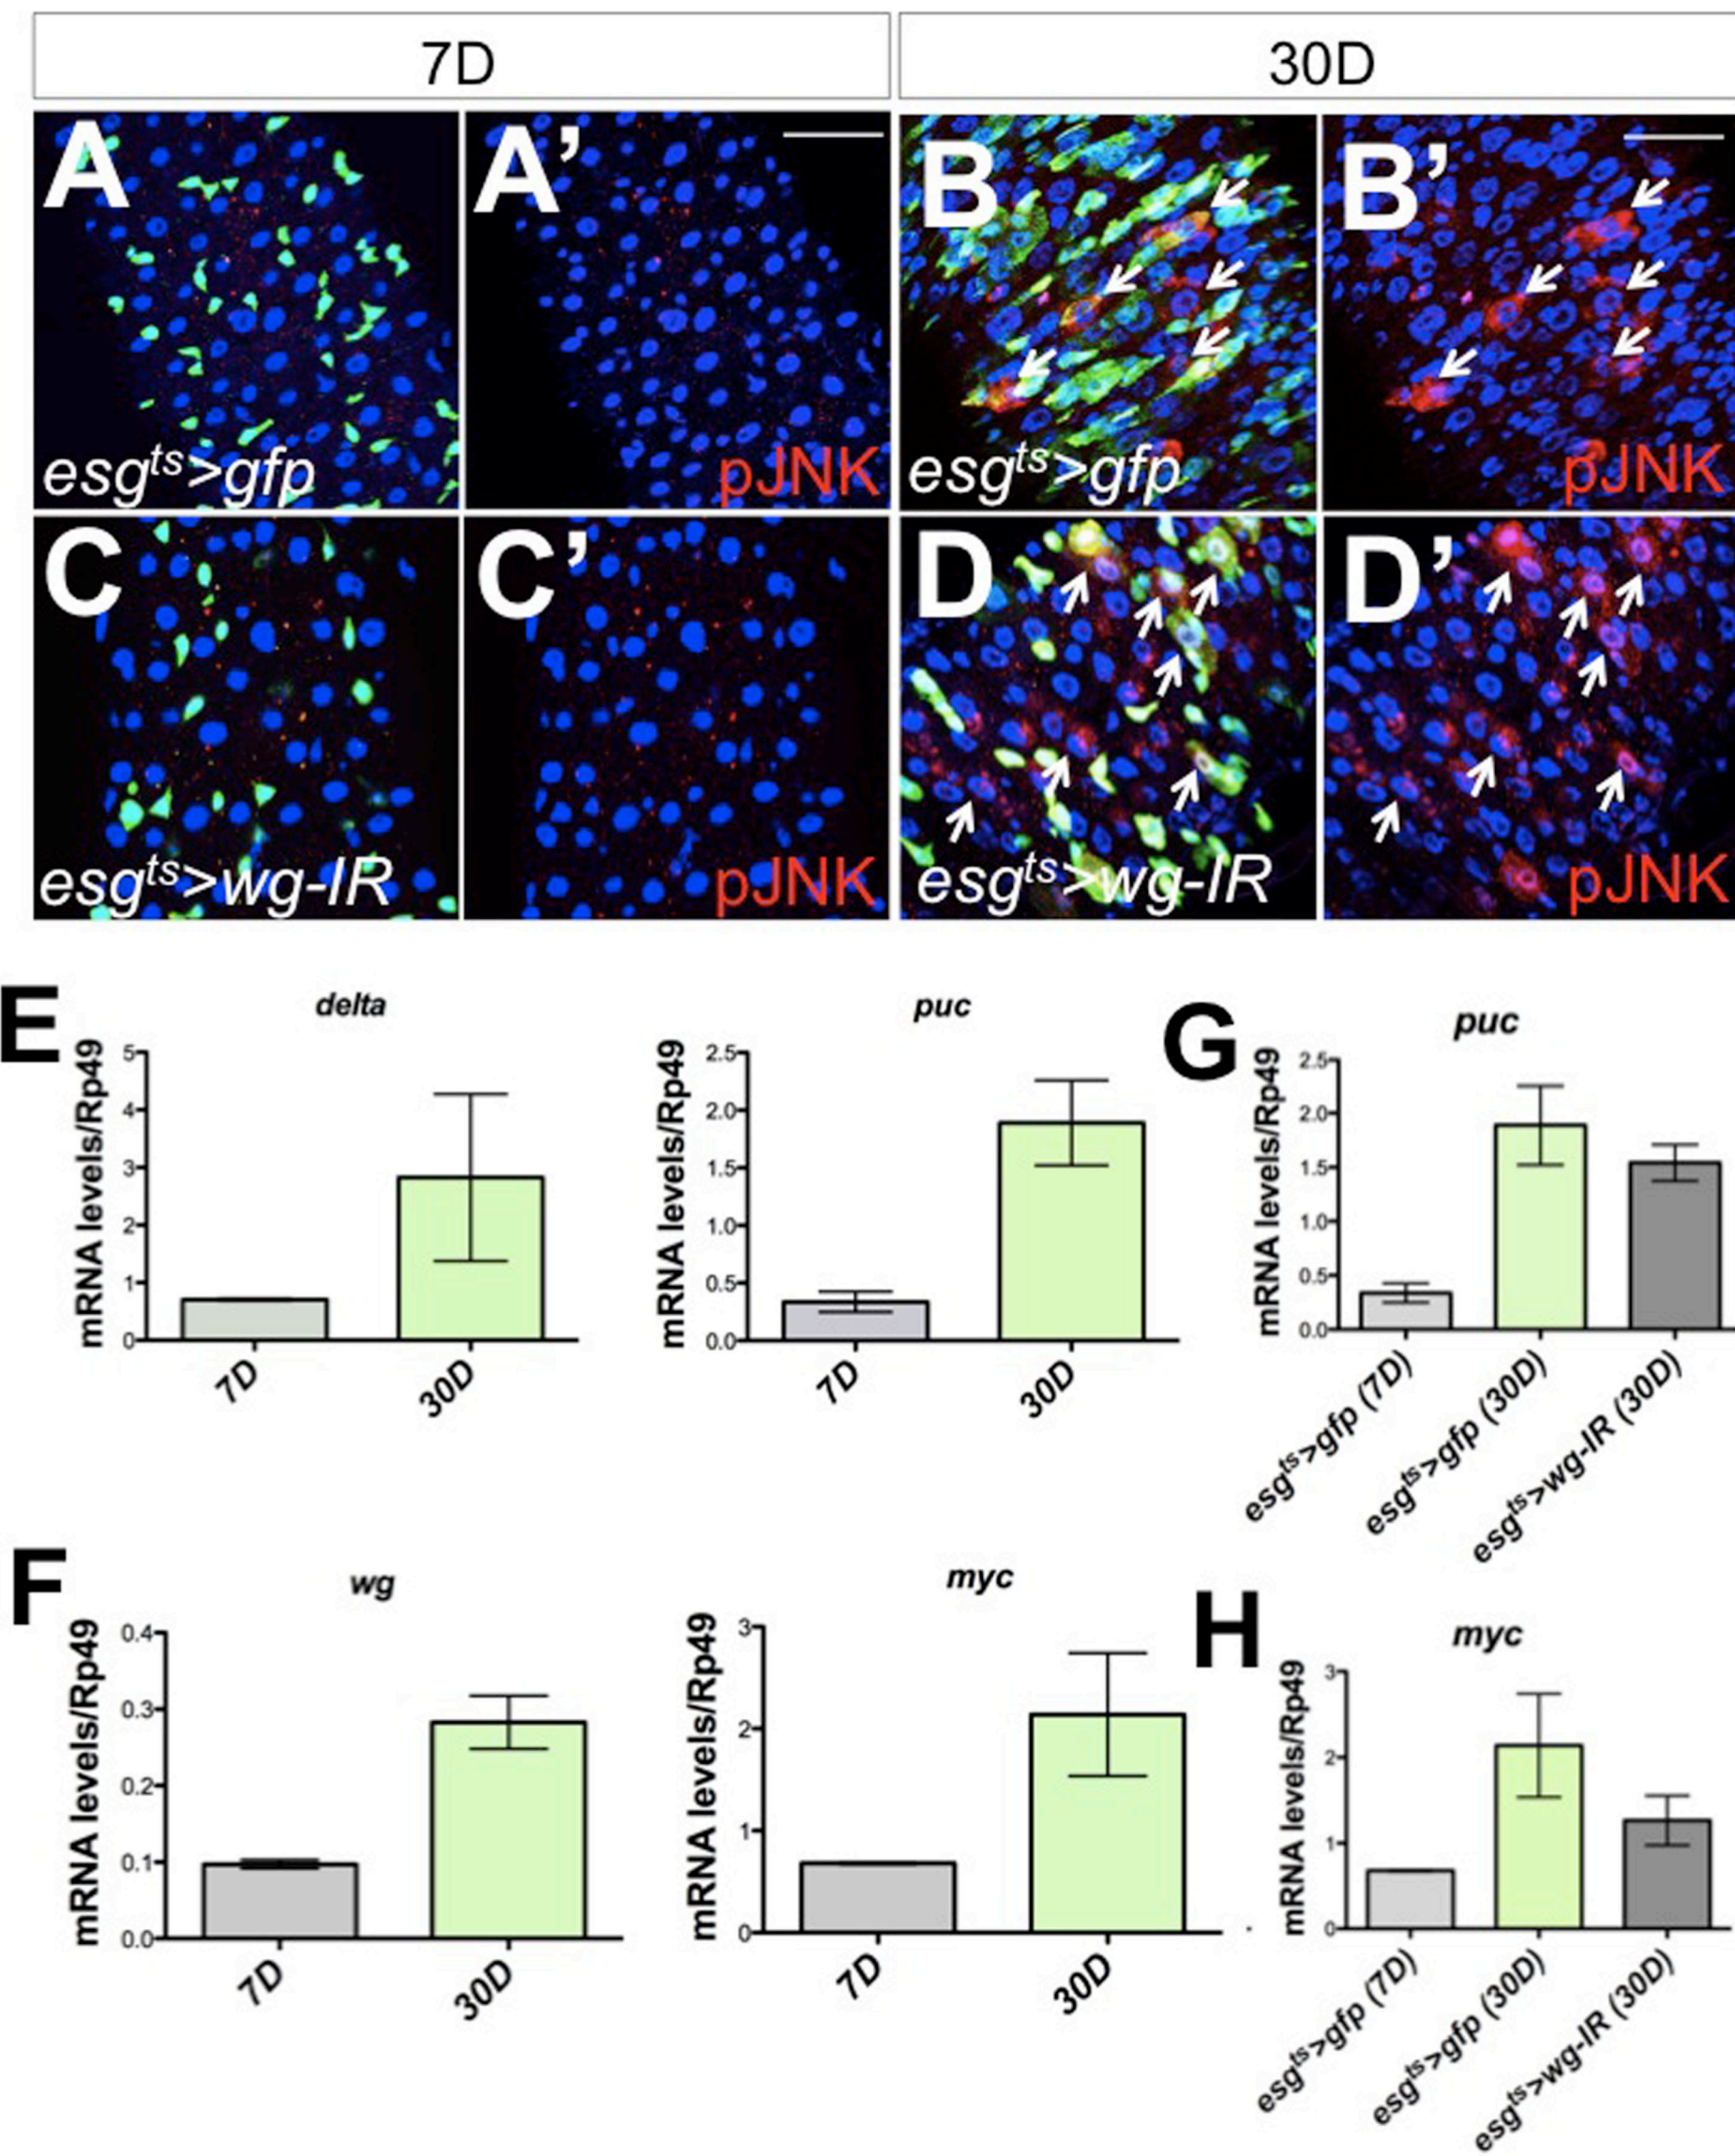

Figure S7

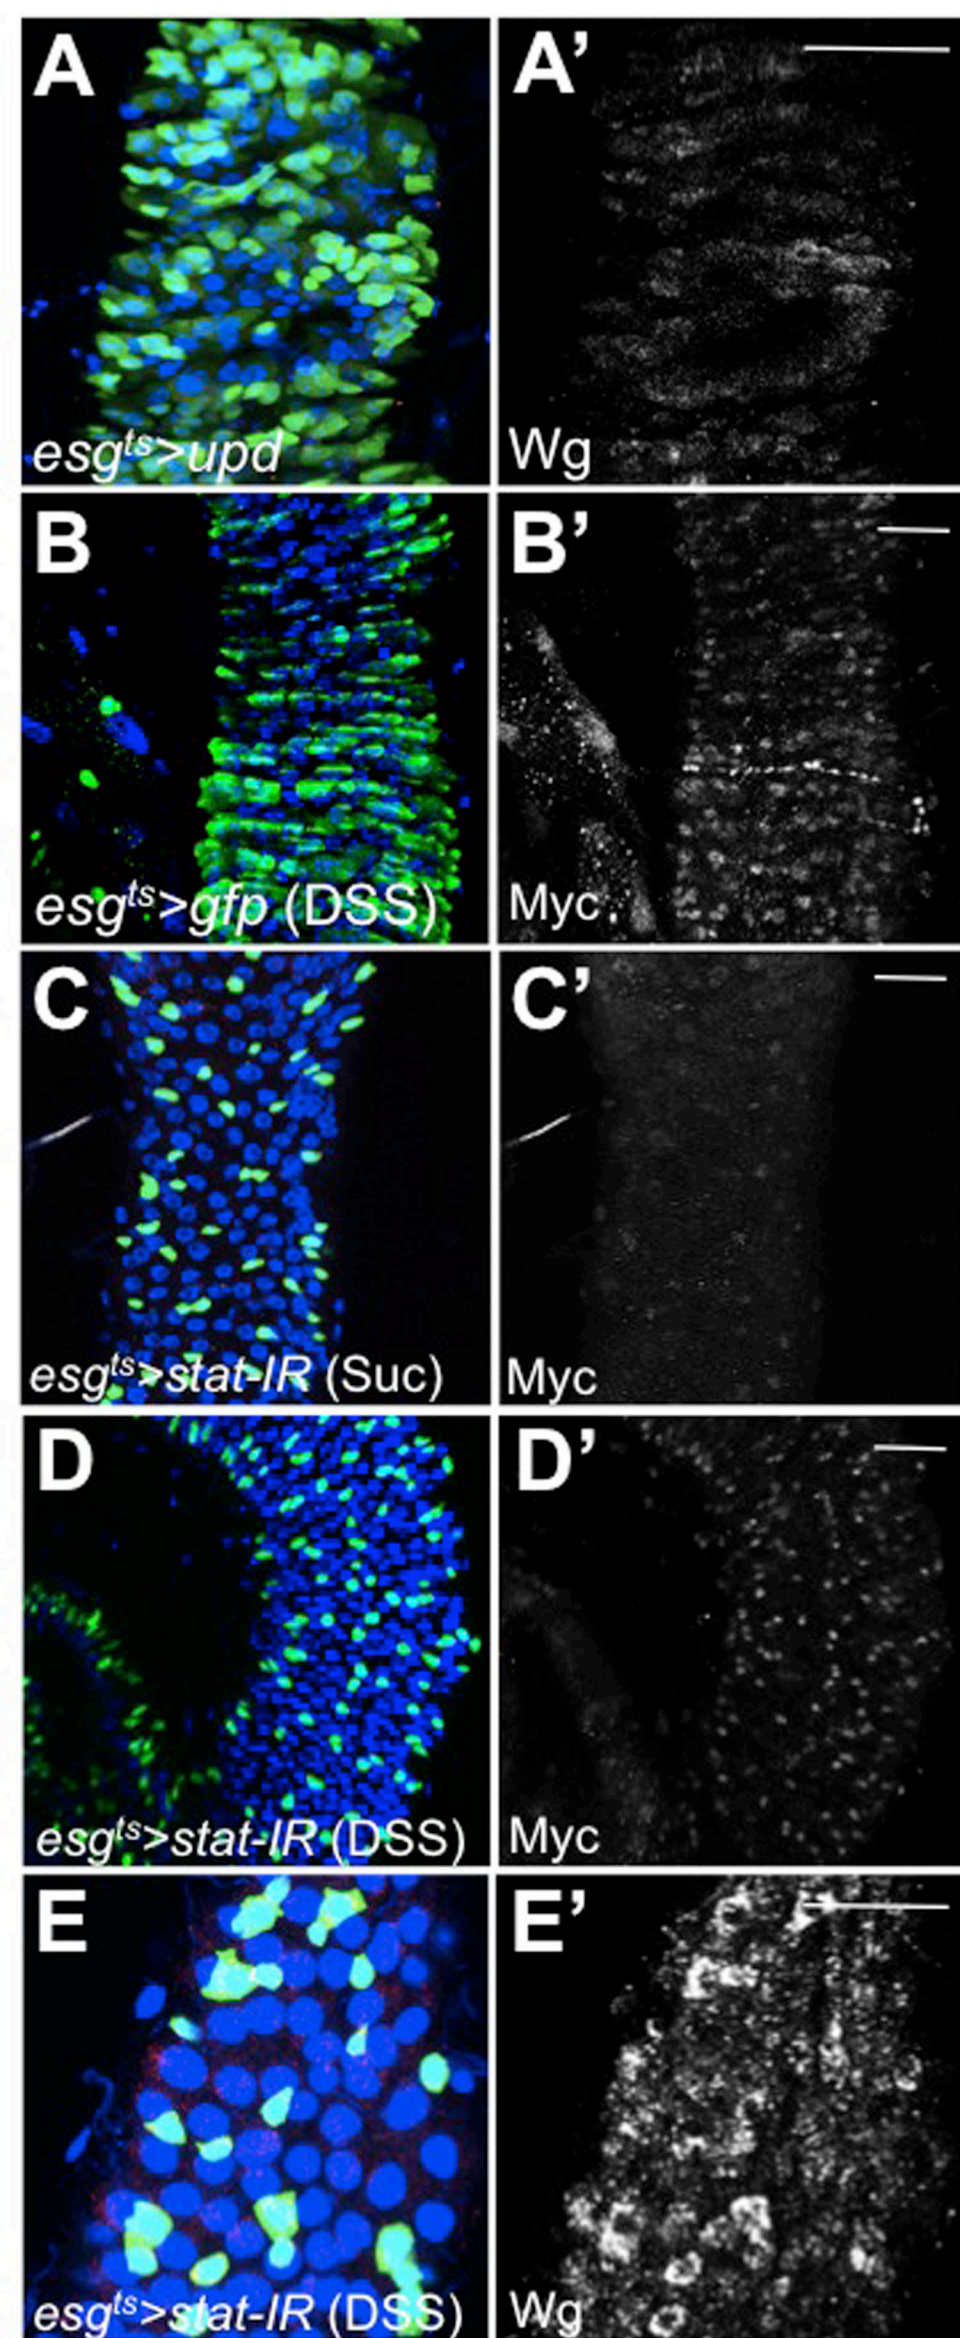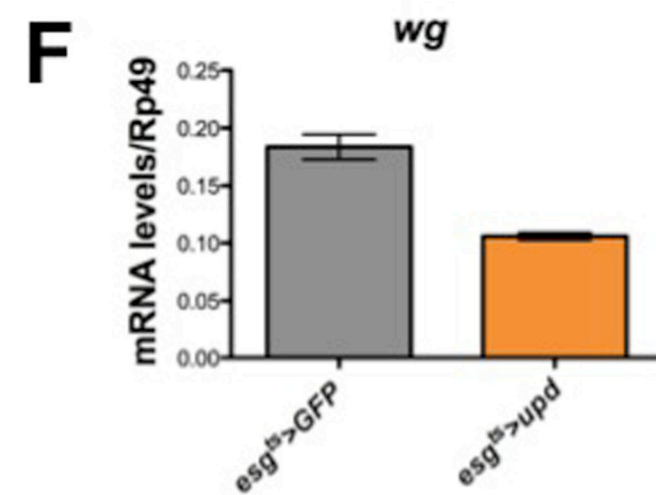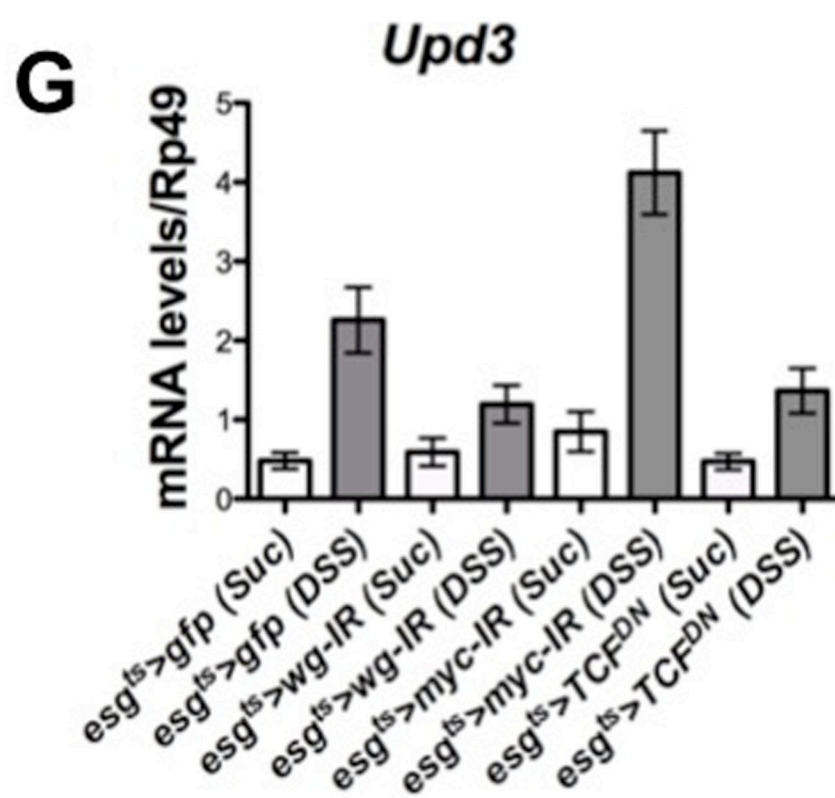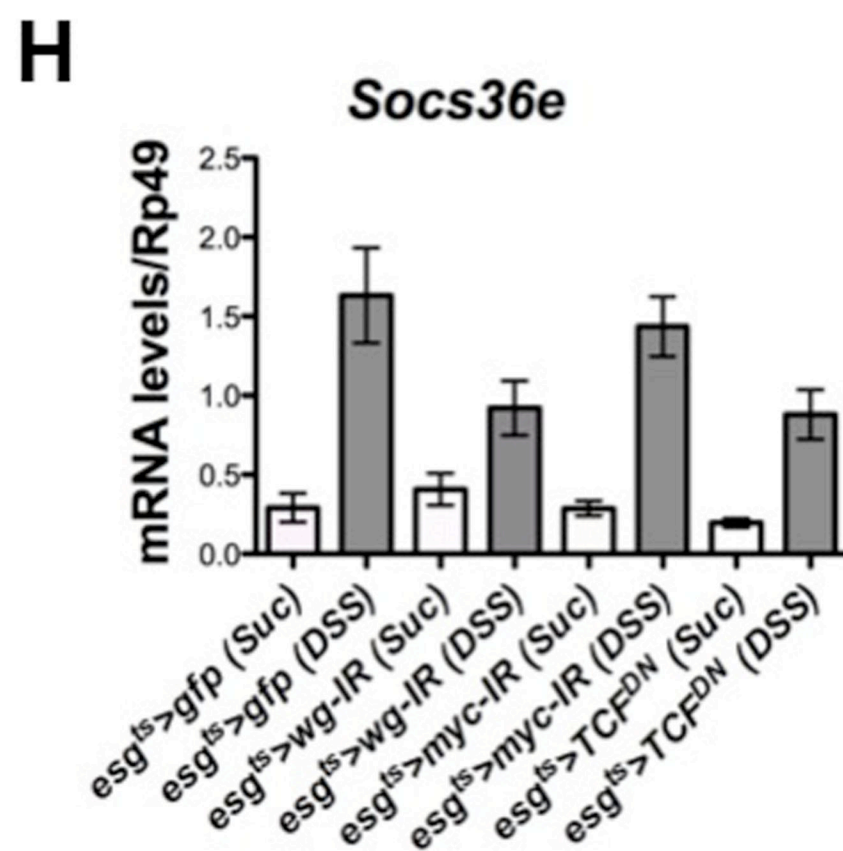

Figure S8
